# Supplementary material for: Ent-abietane diterpenoids and their probable biogenetic precursors from the roots of Euphorbia fischeriana
Source: Royal Society of Chemistry journal article supplement (doi:10.1039/c7ra11982h), 2017-01-01
Supplement: c7ra11982h1.pdf [file c7ra11982h1.pdf]

## Supplementary Information

### ***Ent*-abietane diterpenoids and their probable biogenetic precursors from the roots of *Euphorbia fischeriana***

Jia Zhang,<sup>‡a, b</sup> Jun He,<sup>‡c</sup> Xiao-Xue Wang,<sup>c</sup> Ying-Xue Shi,<sup>a</sup> Nuan Zhang,<sup>a</sup>  
Bing-Zhi Ma,<sup>c</sup> Wei-Ku Zhang,<sup>\*b</sup> and Jie-Kun Xu<sup>\*a</sup>

<sup>a</sup> School of Life Sciences & School of Chinese Medicine Science, Beijing University of Chinese Medicine, Beijing 100029, People's Republic of China

<sup>b</sup> Institute of Clinical Medical Sciences, China-Japan Friendship Hospital, Beijing 100029, People's Republic of China

<sup>c</sup> Department of Pharmacy, China-Japan Friendship Hospital, Beijing 100029, People's Republic of China

Corresponding author. Tel: +86-10-84205662. Fax: +86-10-84205662

E-mail: xjkbucm@163.com

## List of Supporting Information

| No.               | Contents                                                                                                                            | Page |
|-------------------|-------------------------------------------------------------------------------------------------------------------------------------|------|
| <b>Table 1</b>    | The 3D conformers of (5 <i>R</i> ,8 <i>S</i> ,9 <i>R</i> ,12 <i>R</i> ,14 <i>R</i> )- <b>1</b> with Boltzmann distribution over 1%. | 4    |
| <b>Table 2</b>    | The 3D conformers of (5 <i>R</i> ,8 <i>S</i> ,9 <i>R</i> ,12 <i>R</i> ,14 <i>R</i> )- <b>5</b> with Boltzmann distribution over 1%. | 5    |
| <b>Figure S1</b>  | The UV spectrum of compound <b>1</b> in MeOH                                                                                        | 7    |
| <b>Figure S2</b>  | The IR spectrum of compound <b>1</b>                                                                                                | 7    |
| <b>Figure S3</b>  | The HRESIMS spectrum of compound <b>1</b>                                                                                           | 8    |
| <b>Figure S4</b>  | The <sup>1</sup> H NMR spectrum of compound <b>1</b> (CDCl <sub>3</sub> , 400 MHz)                                                  | 9    |
| <b>Figure S5</b>  | The <sup>13</sup> C NMR spectrum of compound <b>1</b> (CDCl <sub>3</sub> , 100 MHz)                                                 | 9    |
| <b>Figure S6</b>  | The DEPT-135 spectrum of compound <b>1</b> (CDCl <sub>3</sub> , 100 MHz)                                                            | 10   |
| <b>Figure S7</b>  | The HSQC spectrum of compound <b>1</b>                                                                                              | 10   |
| <b>Figure S8</b>  | The HMBC spectrum of compound <b>1</b>                                                                                              | 11   |
| <b>Figure S9</b>  | The <sup>1</sup> H- <sup>1</sup> H COSY spectrum of compound <b>1</b> (CDCl <sub>3</sub> , 400 MHz)                                 | 11   |
| <b>Figure S10</b> | The expanded <sup>1</sup> H- <sup>1</sup> H COSY spectrum of compound <b>1</b> (CDCl <sub>3</sub> , 400 MHz)                        | 12   |
| <b>Figure S11</b> | The NOESY spectrum of compound <b>1</b> (CDCl <sub>3</sub> , 400 MHz)                                                               | 12   |
| <b>Figure S12</b> | The ECD spectrum of compound <b>1</b> in MeOH                                                                                       | 13   |
| <b>Figure S13</b> | The UV spectrum of compound <b>2</b> in MeOH                                                                                        | 13   |
| <b>Figure S14</b> | The IR spectrum of compound <b>2</b>                                                                                                | 14   |
| <b>Figure S15</b> | The HRESIMS spectrum of compound <b>2</b>                                                                                           | 15   |
| <b>Figure S16</b> | The <sup>1</sup> H NMR spectrum of compound <b>2</b> (CDCl <sub>3</sub> , 400 MHz)                                                  | 16   |
| <b>Figure S17</b> | The <sup>13</sup> C NMR spectrum of compound <b>2</b> (CDCl <sub>3</sub> , 100 MHz)                                                 | 16   |
| <b>Figure S18</b> | The HSQC spectrum of compound <b>2</b>                                                                                              | 17   |
| <b>Figure S19</b> | The HMBC spectrum of compound <b>2</b>                                                                                              | 17   |
| <b>Figure S20</b> | The NOESY spectrum of compound <b>2</b> (CDCl <sub>3</sub> , 400 MHz)                                                               | 18   |
| <b>Figure S21</b> | The UV spectrum of compound <b>3</b> in MeOH                                                                                        | 18   |
| <b>Figure S22</b> | The IR spectrum of compound <b>3</b>                                                                                                | 19   |
| <b>Figure S23</b> | The HRESIMS spectrum of compound <b>3</b>                                                                                           | 20   |
| <b>Figure S24</b> | The <sup>1</sup> H NMR spectrum of compound <b>3</b> (CDCl <sub>3</sub> , 400 MHz)                                                  | 21   |
| <b>Figure S25</b> | The <sup>13</sup> C NMR spectrum of compound <b>3</b> (CDCl <sub>3</sub> , 100 MHz)                                                 | 21   |
| <b>Figure S26</b> | The HSQC spectrum of compound <b>3</b>                                                                                              | 22   |
| <b>Figure S27</b> | The HMBC spectrum of compound <b>3</b>                                                                                              | 22   |
| <b>Figure S28</b> | The NOESY spectrum of compound <b>3</b> (CDCl <sub>3</sub> , 400 MHz)                                                               | 23   |
| <b>Figure S29</b> | The NOESY spectrum of compound <b>3</b> (CD <sub>3</sub> OH, 400 MHz)                                                               | 23   |
| <b>Figure S30</b> | The UV spectrum of compound <b>4</b> in MeOH                                                                                        | 24   |
| <b>Figure S31</b> | The IR spectrum of compound <b>4</b>                                                                                                | 24   |
| <b>Figure S32</b> | The HRESIMS spectrum of compound <b>4</b>                                                                                           | 25   |
| <b>Figure S33</b> | The <sup>1</sup> H NMR spectrum of compound <b>4</b> (CDCl <sub>3</sub> , 400 MHz)                                                  | 26   |
| <b>Figure S34</b> | The <sup>13</sup> C NMR spectrum of compound <b>4</b> (CDCl <sub>3</sub> , 100 MHz)                                                 | 26   |
| <b>Figure S35</b> | The HSQC spectrum of compound <b>4</b>                                                                                              | 27   |
| <b>Figure S36</b> | The HMBC spectrum of compound <b>4</b>                                                                                              | 27   |
| <b>Figure S37</b> | The NOE spectrum of compound <b>4</b> (CDCl <sub>3</sub> , 600 MHz)                                                                 | 28   |

---

|                   |                                                                                     |    |
|-------------------|-------------------------------------------------------------------------------------|----|
| <b>Figure S38</b> | The UV spectrum of compound <b>5</b> in MeOH                                        | 28 |
| <b>Figure S39</b> | The IR spectrum of compound <b>5</b>                                                | 29 |
| <b>Figure S40</b> | The HRESIMS spectrum of compound <b>5</b>                                           | 30 |
| <b>Figure S41</b> | The <sup>1</sup> H NMR spectrum of compound <b>5</b> (CDCl <sub>3</sub> , 400 MHz)  | 31 |
| <b>Figure S42</b> | The <sup>13</sup> C NMR spectrum of compound <b>5</b> (CDCl <sub>3</sub> , 100 MHz) | 31 |
| <b>Figure S43</b> | The HSQC spectrum of compound <b>5</b>                                              | 32 |
| <b>Figure S44</b> | The HMBC spectrum of compound <b>5</b>                                              | 32 |
| <b>Figure S45</b> | The NOESY spectrum of compound <b>5</b> (CDCl <sub>3</sub> , 400 MHz)               | 33 |
| <b>Figure S46</b> | The ECD spectrum of compound <b>5</b> in MeOH                                       | 33 |

---

**Table 1.** The 3D conformers of (5*R*,7*R*,9*S*,10*R*)-1 with Boltzmann distribution over 1%.

| No. | Conformer                                                                           | Population (%) |
|-----|-------------------------------------------------------------------------------------|----------------|
| 1   | 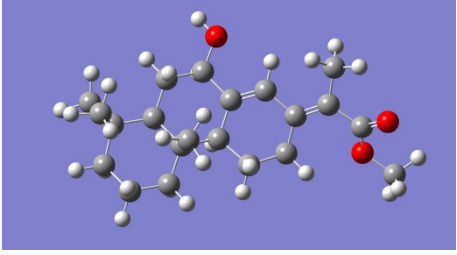   | 49.3           |
| 2   |    | 41.4           |
| 3   |   | 5.3            |
| 4   |  | 3.7            |

**Table 2.** The 3D conformers of (5*R*,8*S*,9*R*,12*R*,14*R*)-**5** with Boltzmann distribution over 1%.

| No. | Conformer                                                                           | Population (%) |
|-----|-------------------------------------------------------------------------------------|----------------|
| 1   | 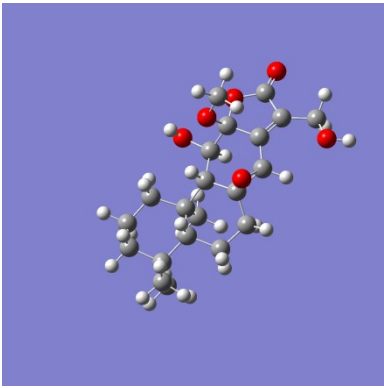   | 10.63          |
| 3   |   | 9.58           |
| 4   |  | 18.98          |
| 5   |  | 21.23          |

|   |                                                                                     |       |
|---|-------------------------------------------------------------------------------------|-------|
| 6 | 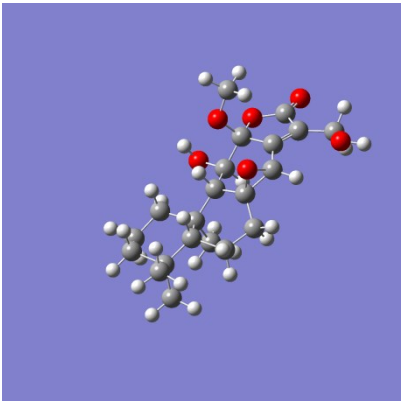   | 10.62 |
| 8 |   | 9.59  |
| 9 |  | 18.99 |

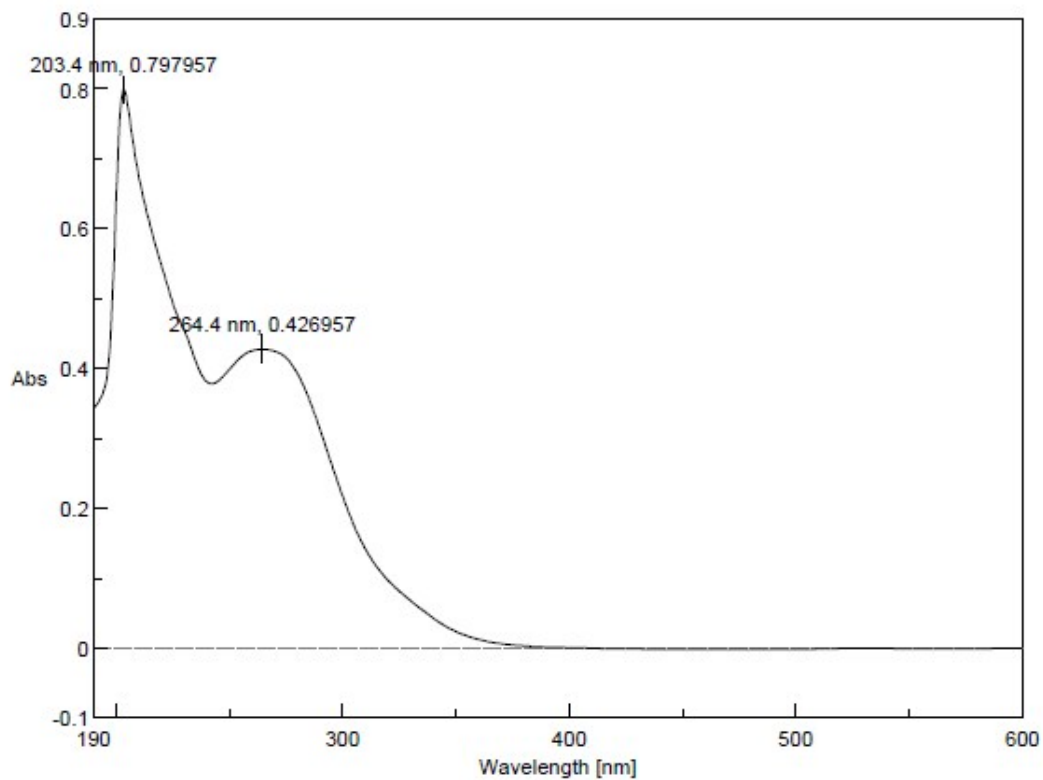

**Figure S1.** The UV spectrum of compound 1 in MeOH

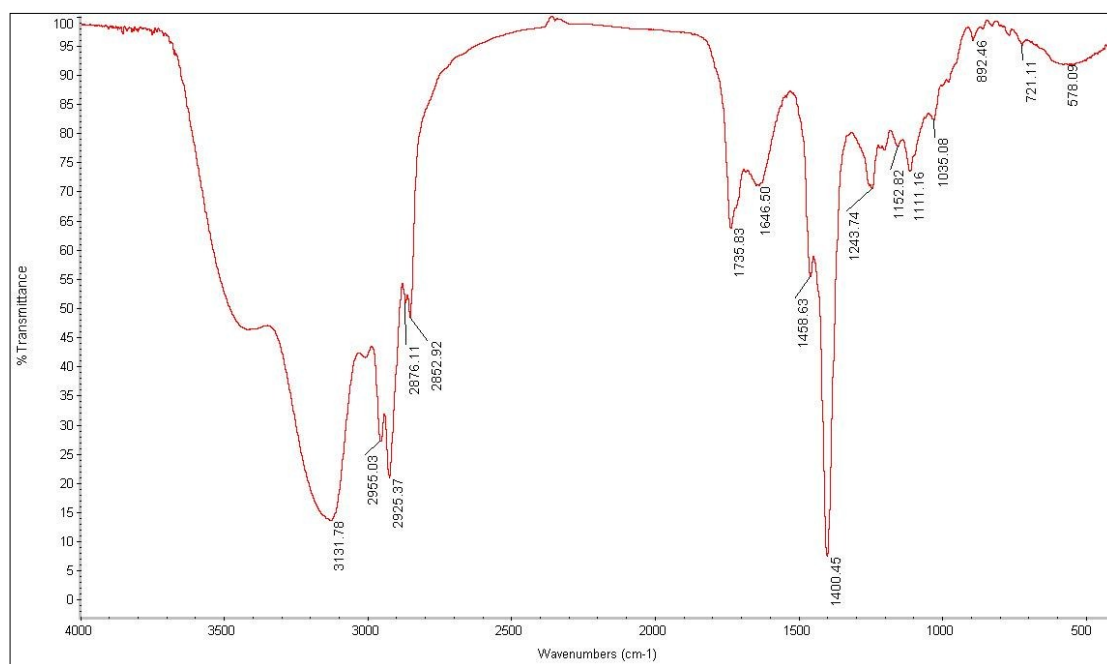

**Figure S2.** The IR spectrum of compound 1

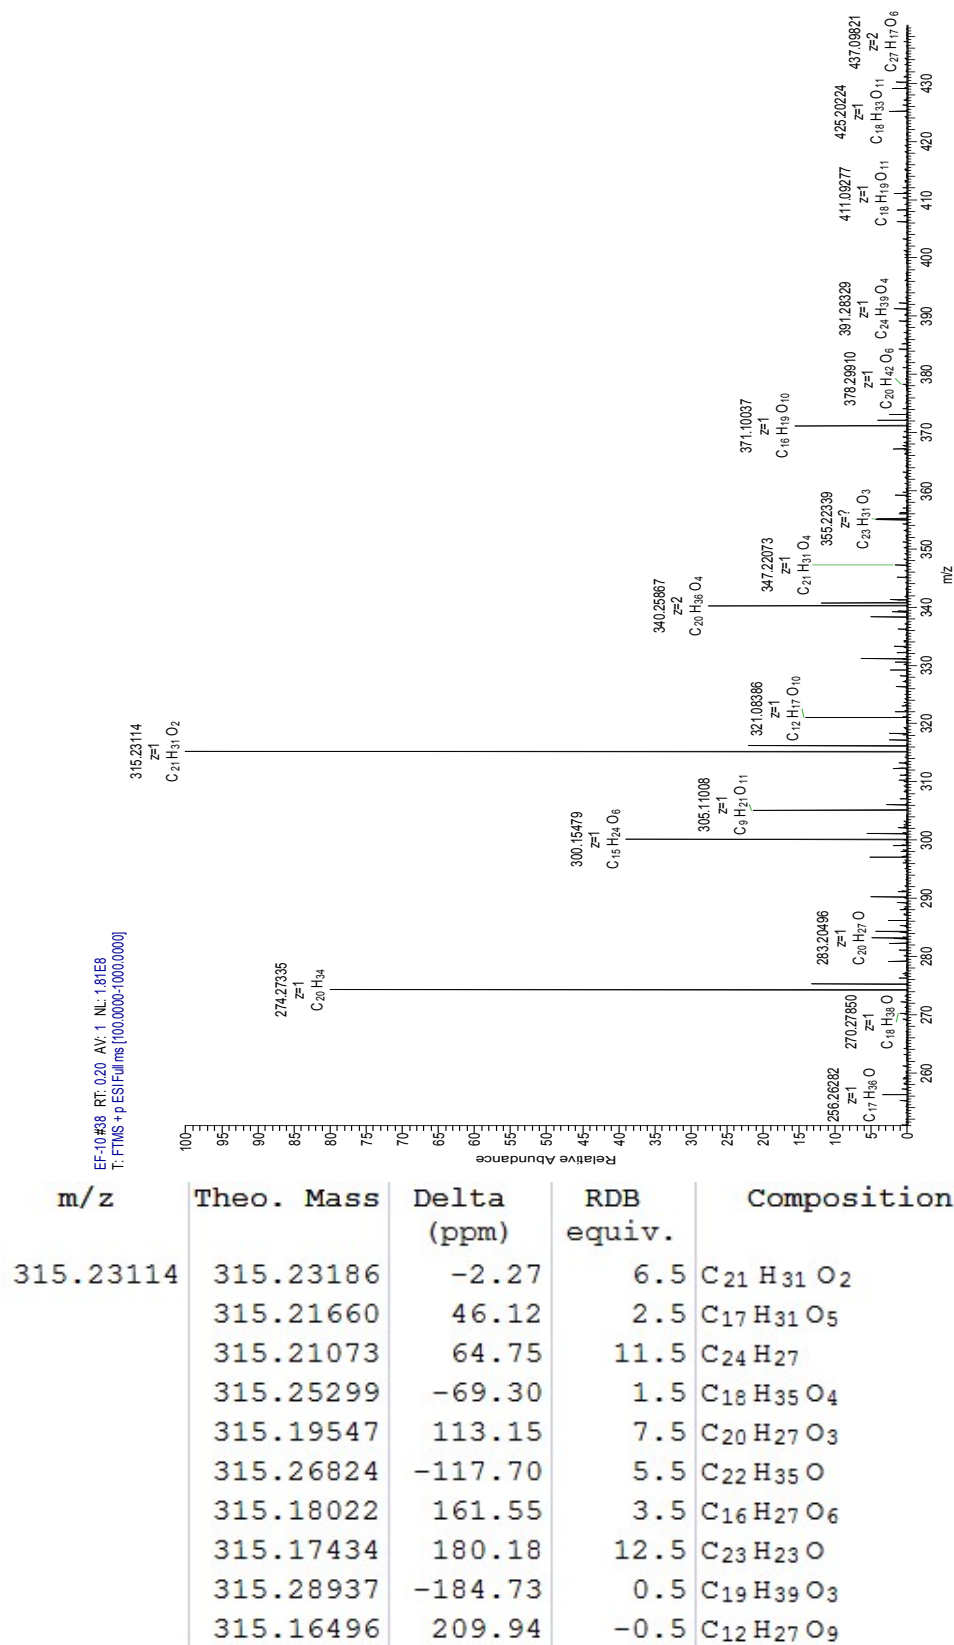

Figure S3. The HRESIMS spectrum of compound 1



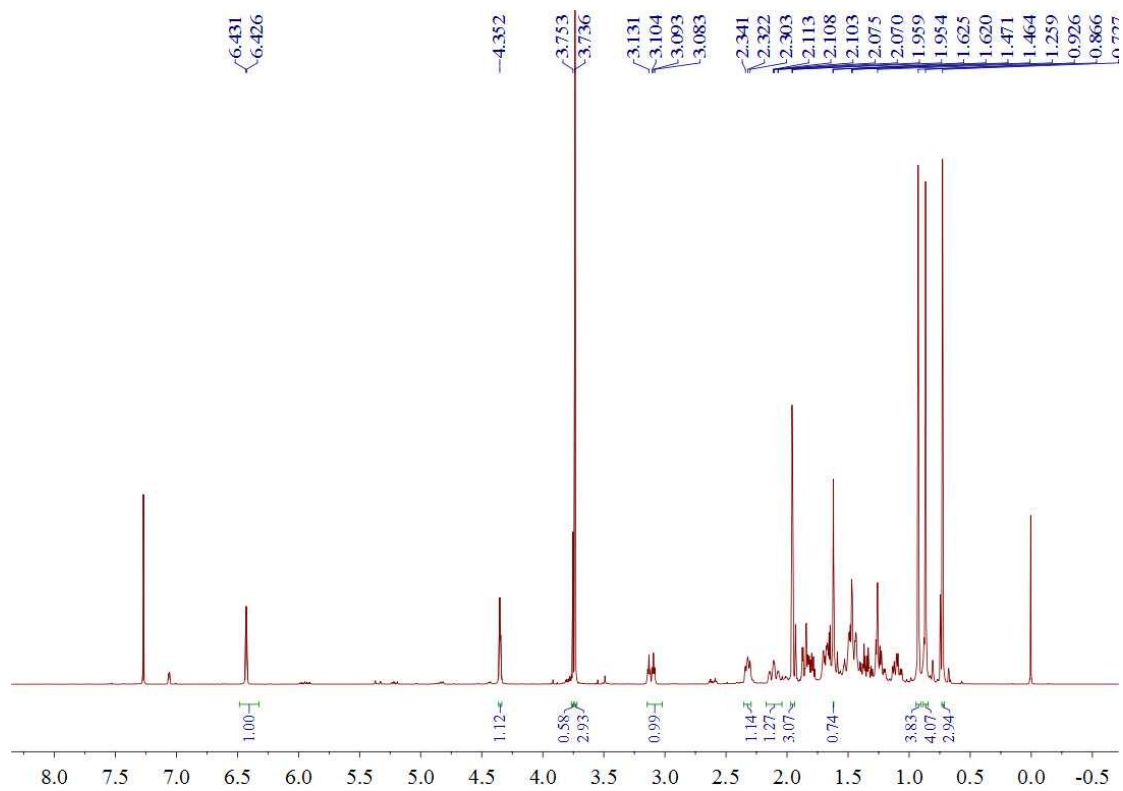

**Figure S4.** The  $^1\text{H}$  NMR spectrum of compound **1** ( $\text{CDCl}_3$ , 400 MHz)

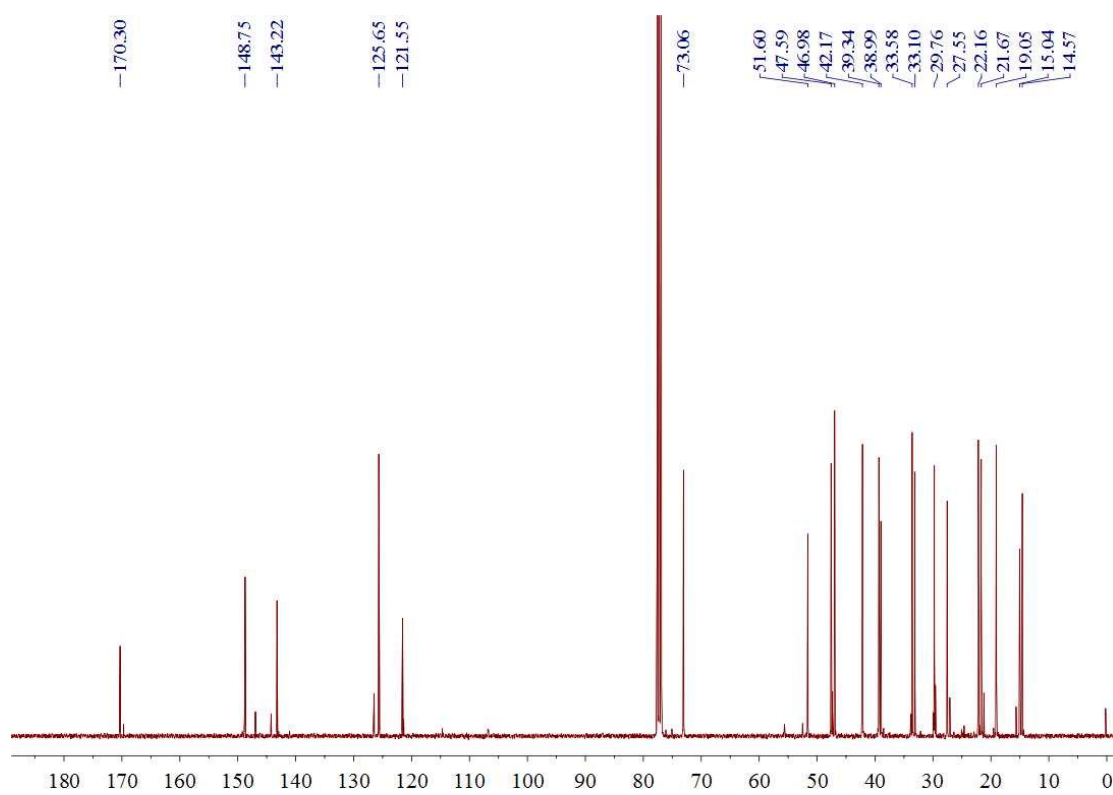

**Figure S5.** The  $^{13}\text{C}$  NMR spectrum of compound **1** ( $\text{CDCl}_3$ , 100 MHz)

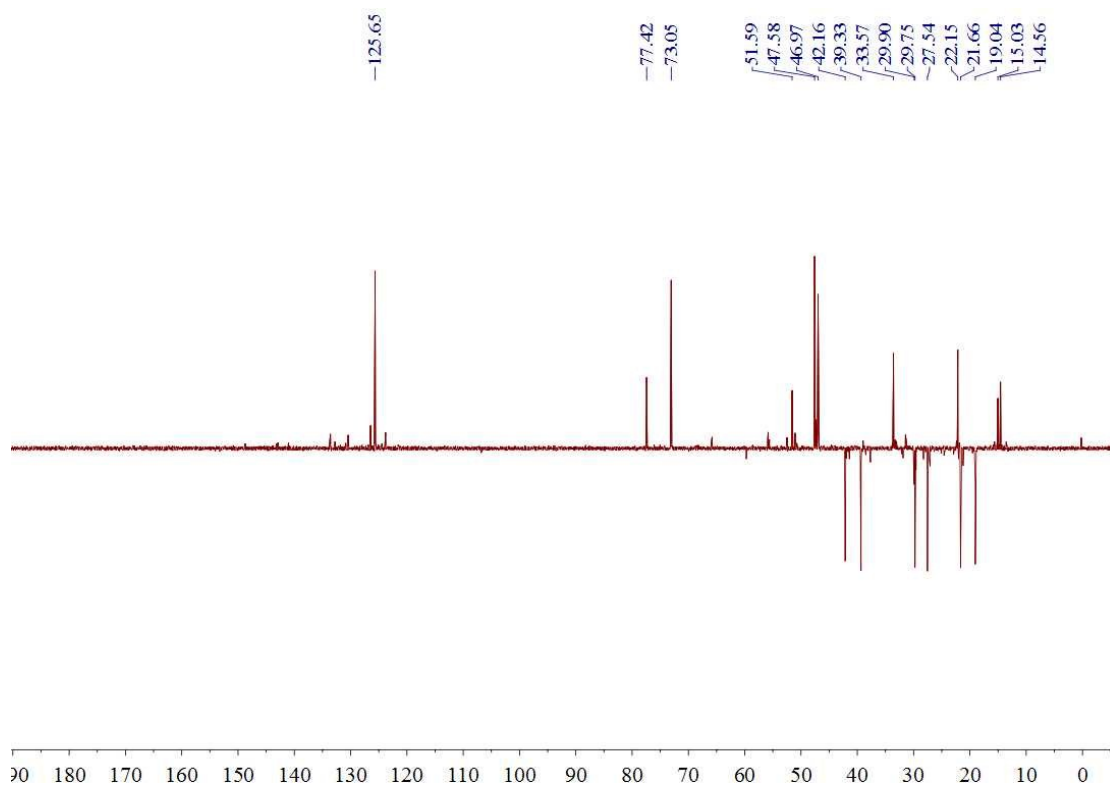

**Figure S6.** The DEPT-135 spectrum of compound **1** ( $\text{CDCl}_3$ , 100 MHz)

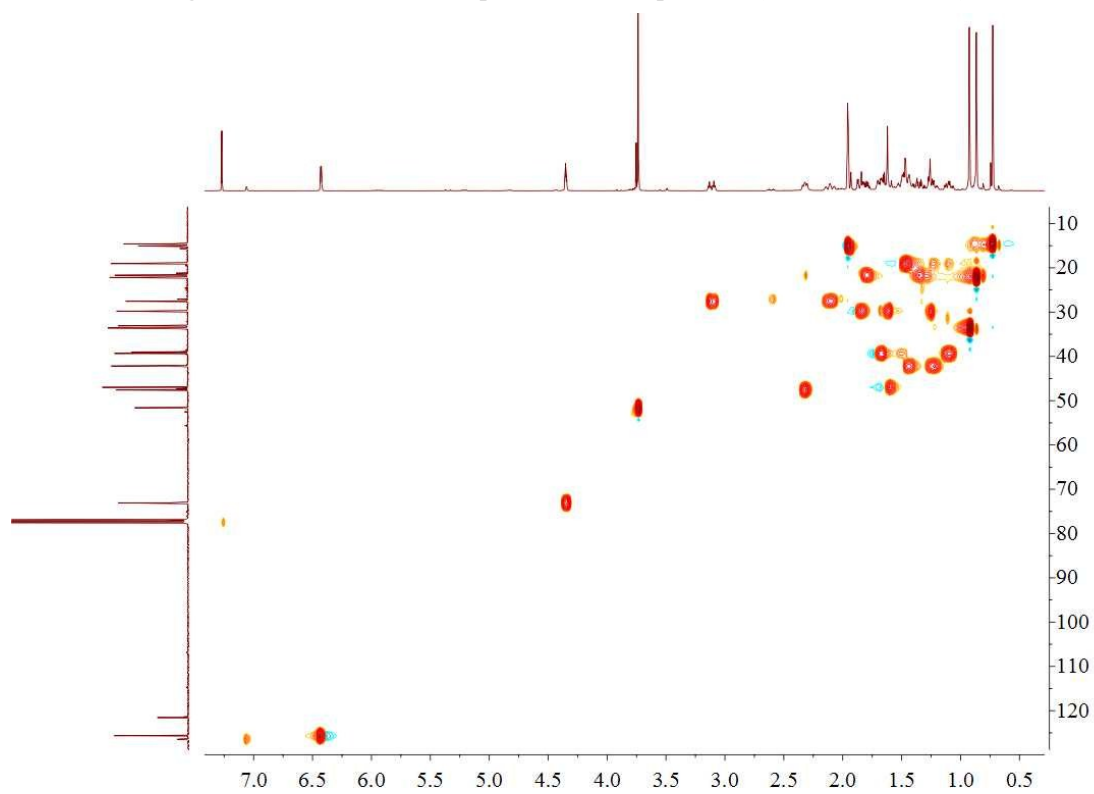

**Figure S7.** The HSQC spectrum of compound **1**

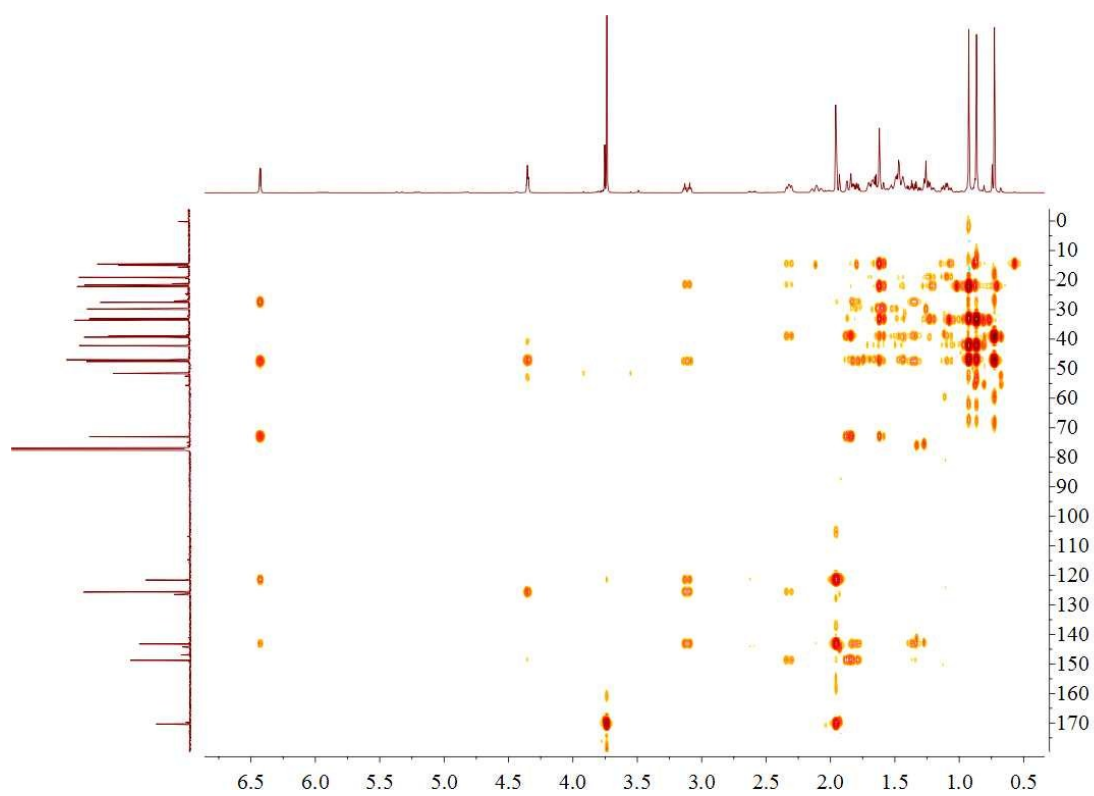

**Figure S8.** The HMBC spectrum of compound **1**

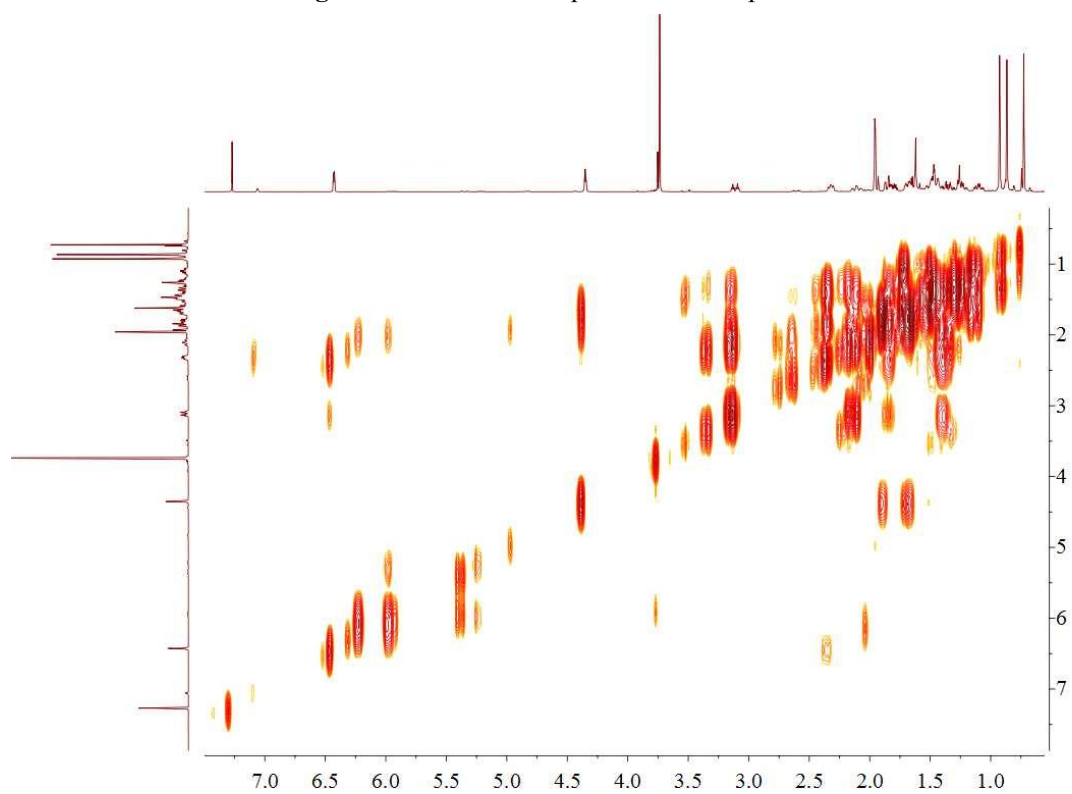

**Figure S9.** The COSY spectrum of compound **1** (CDCl<sub>3</sub>, 400 MHz)

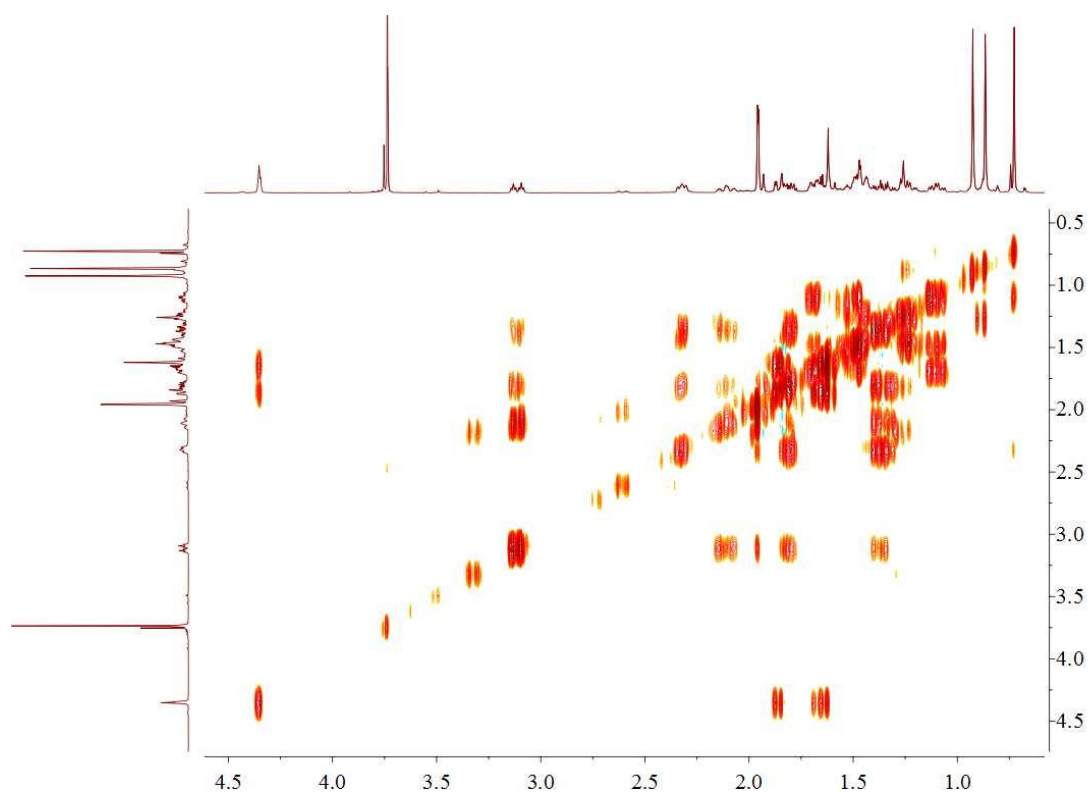

**Figure S10.** The expanded COSY spectrum of compound **1** (CDCl<sub>3</sub>, 400 MHz)

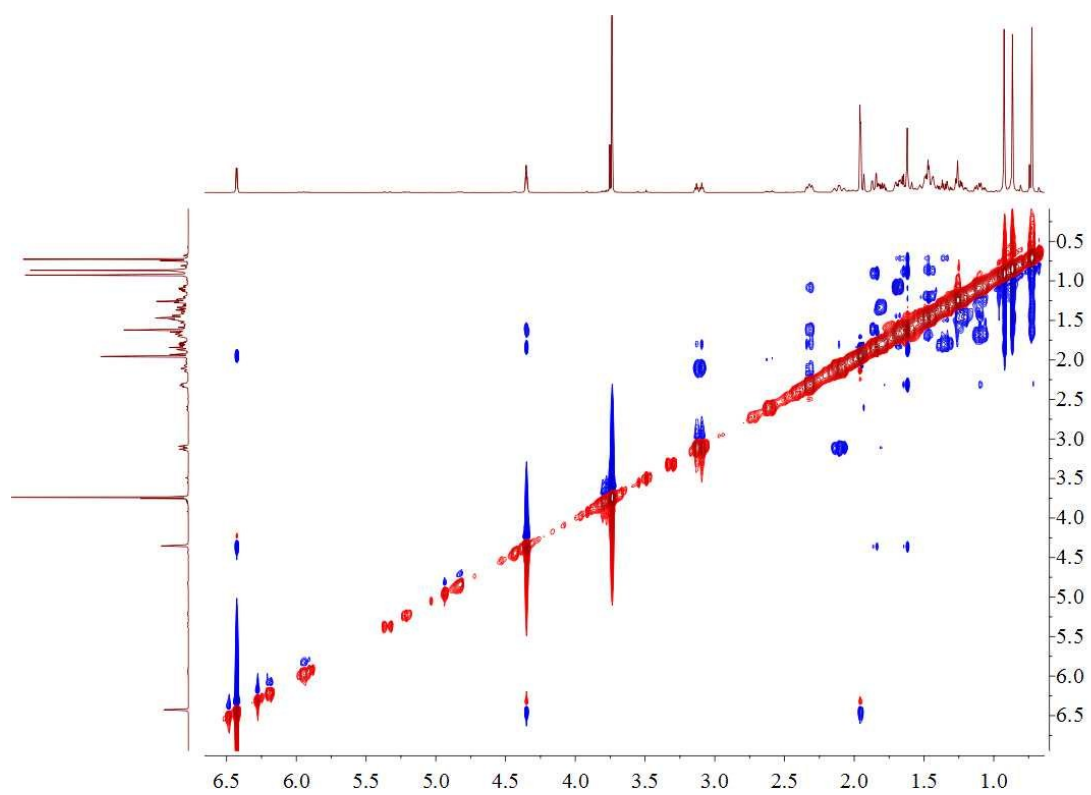

**Figure S11.** The NOESY spectrum of compound **1** (CDCl<sub>3</sub>, 400 MHz)

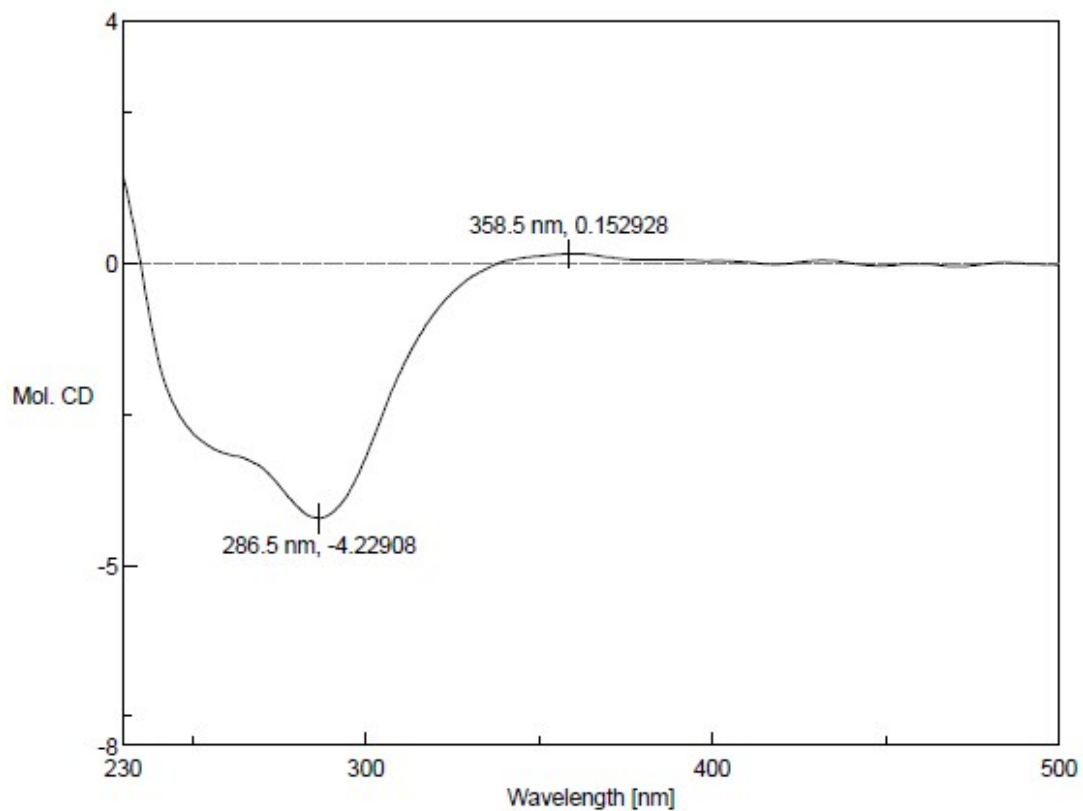

**Figure S12.** The ECD spectrum of compound **1** in MeOH

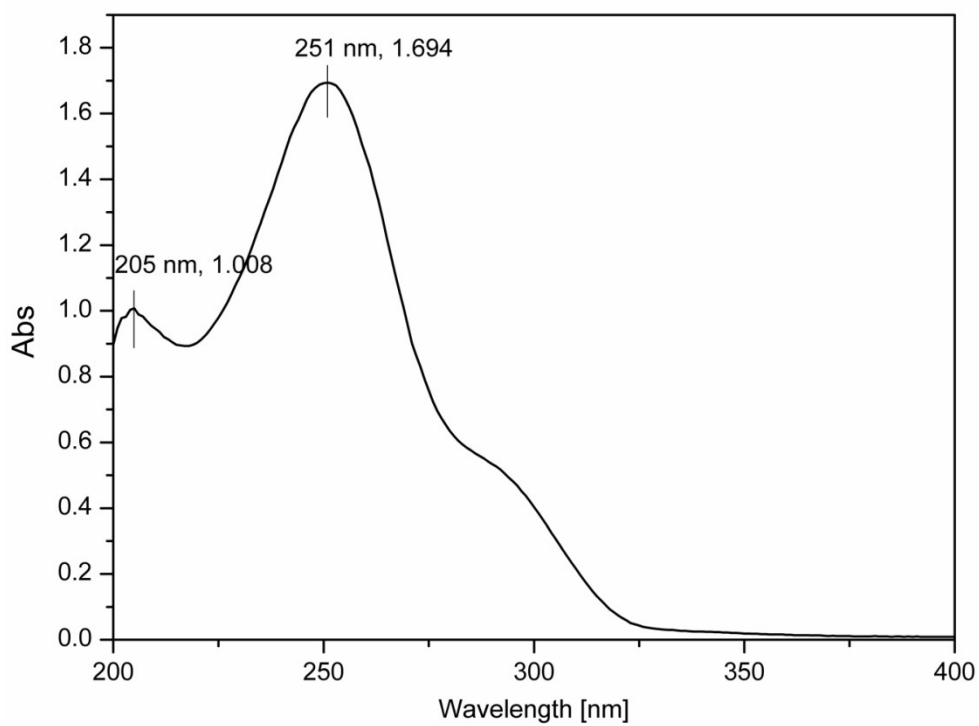

**Figure S13.** The UV spectrum of compound **2** in MeOH

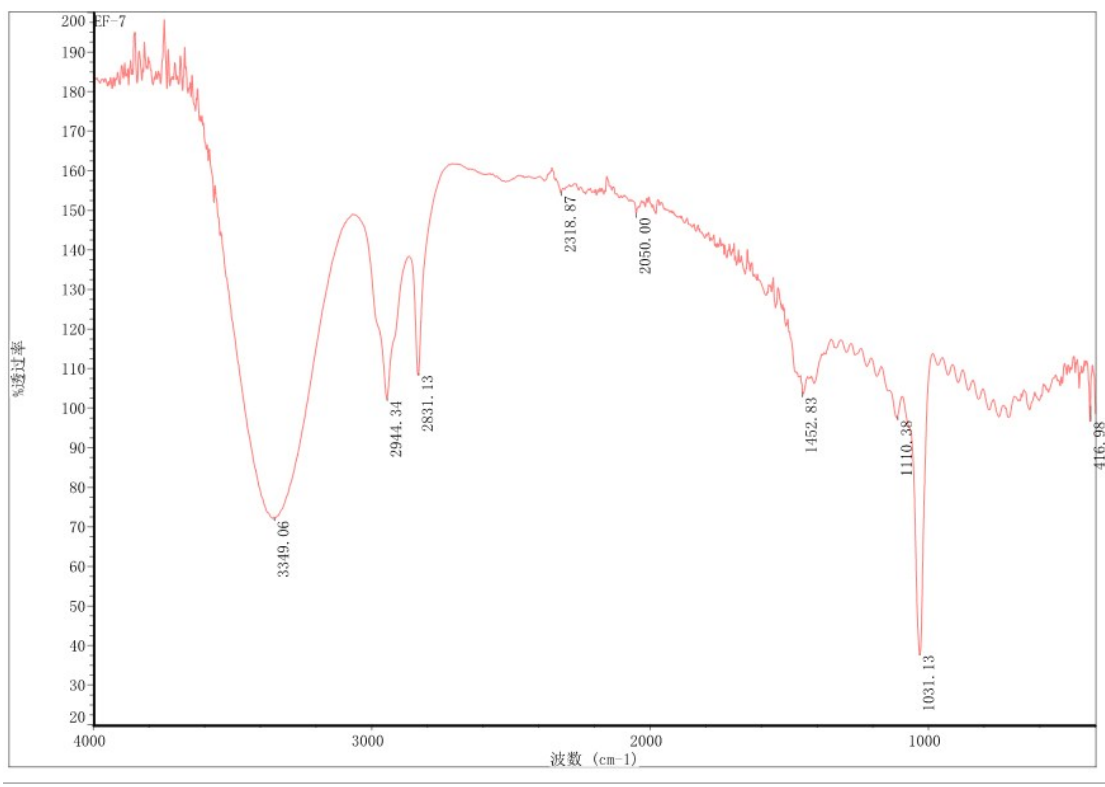

**Figure S14.** The IR spectrum of compound **2**

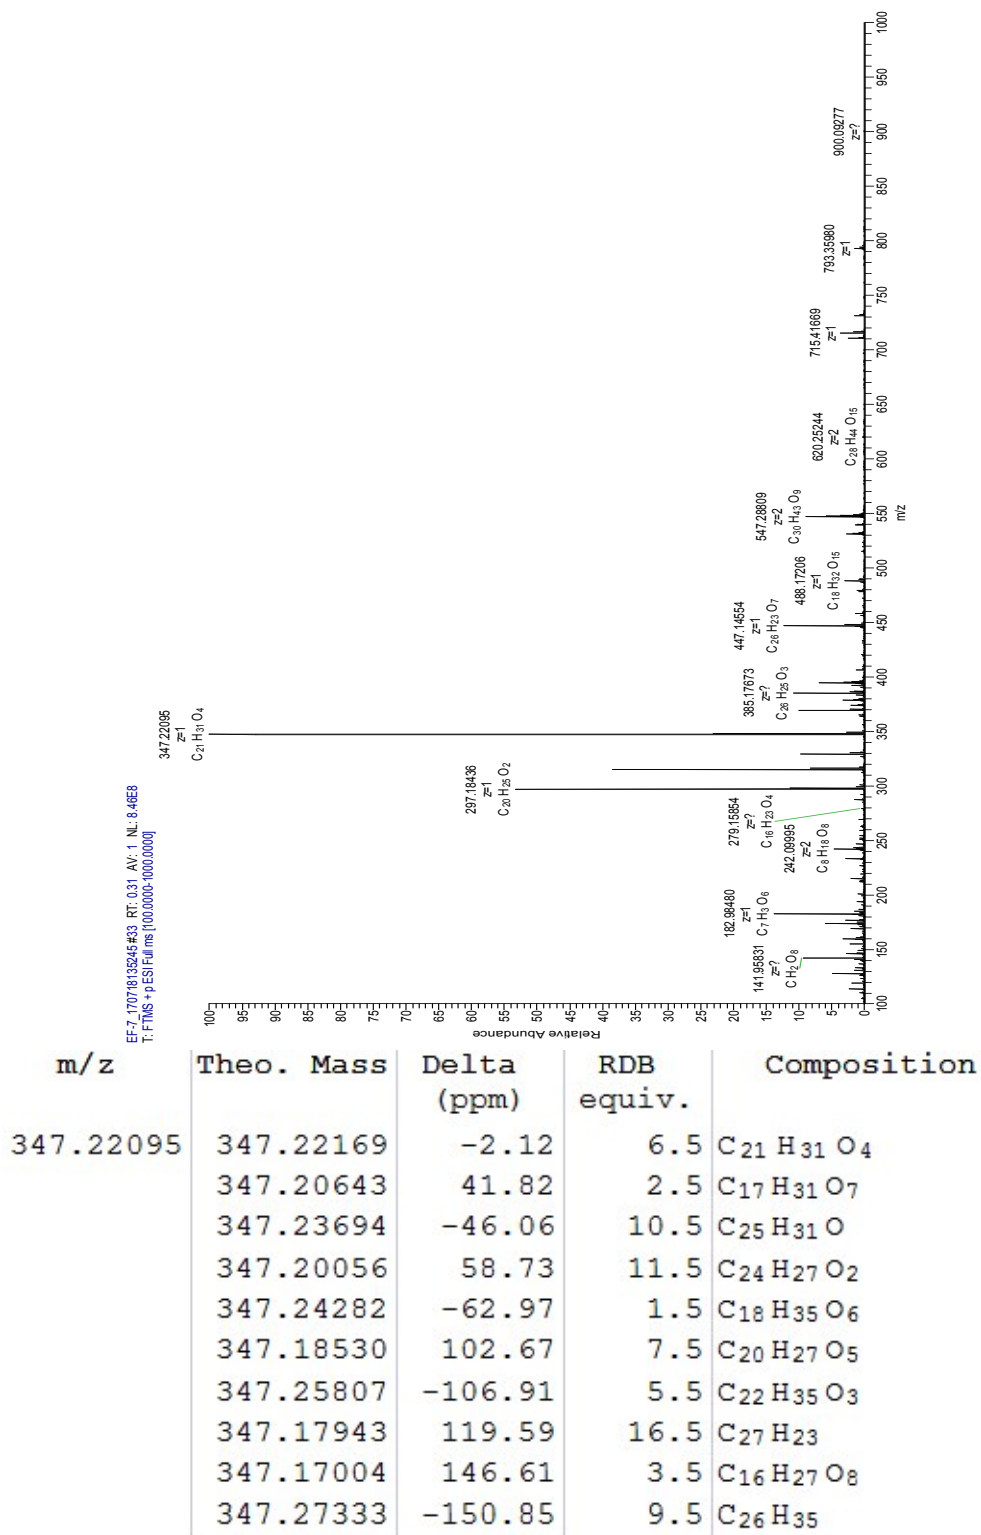

Figure S15. The HRESIMS spectrum of compound 2

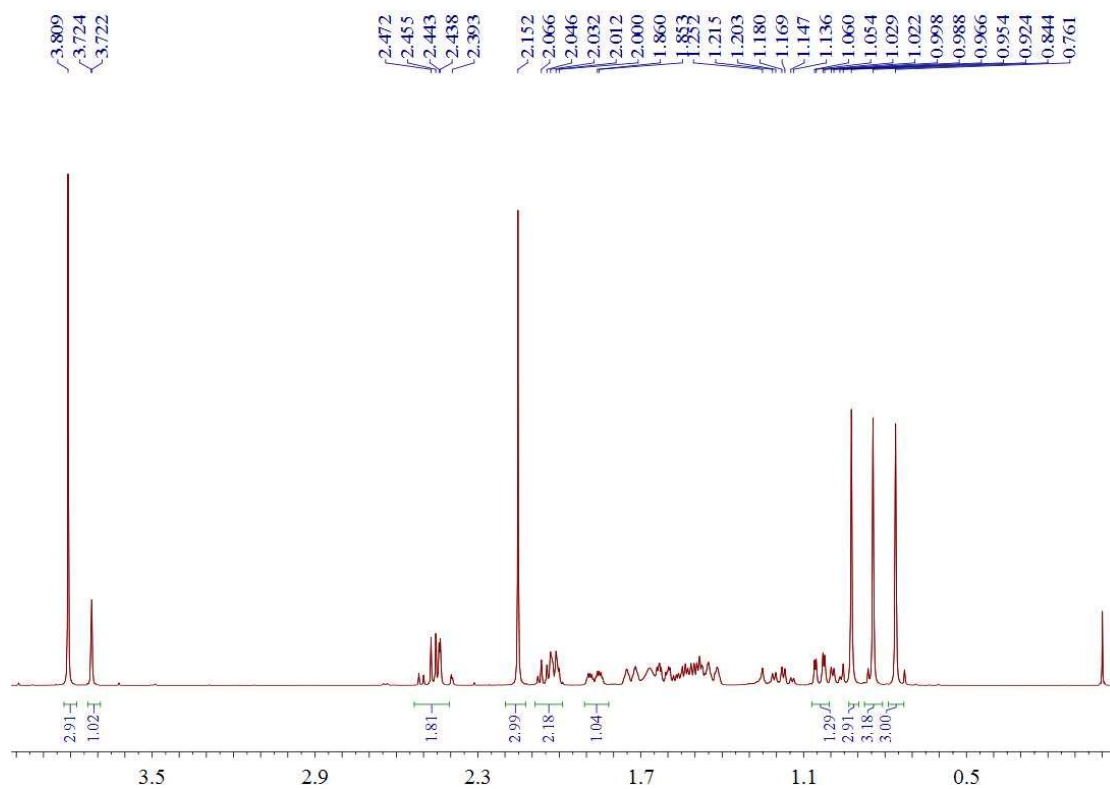

**Figure S16.** The  $^1\text{H}$  NMR spectrum of compound **2** ( $\text{CDCl}_3$ , 400 MHz)

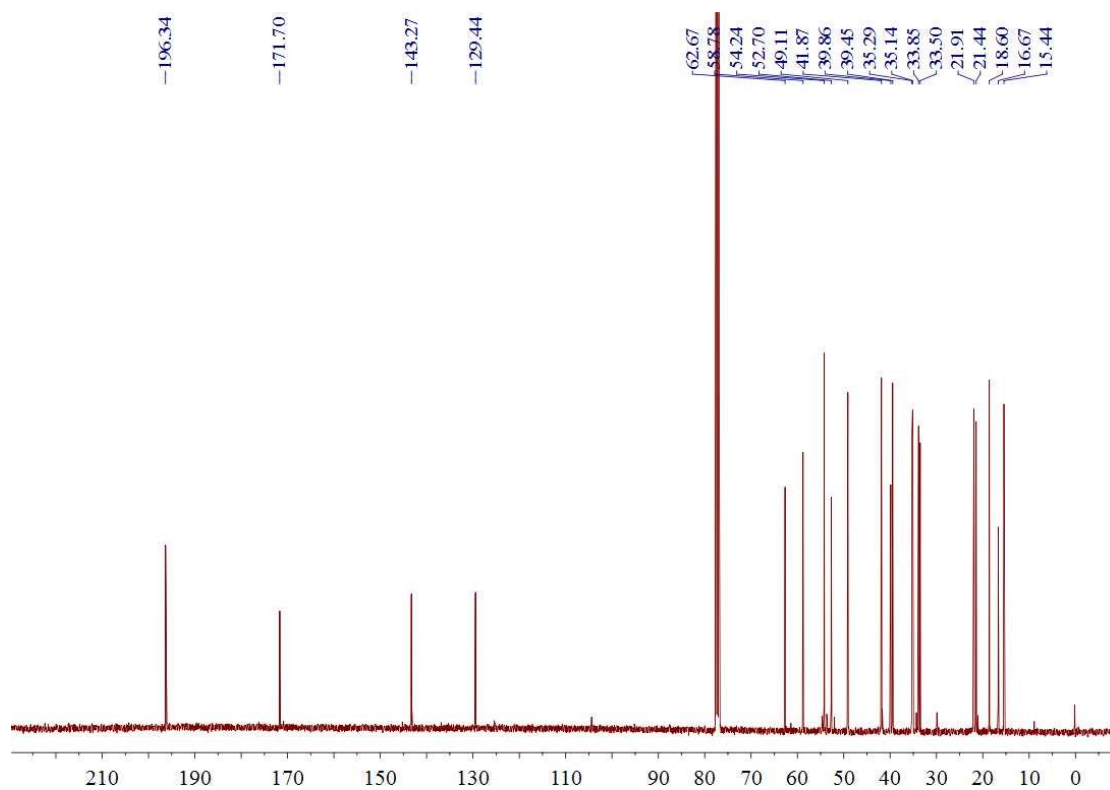

**Figure S17.** The  $^{13}\text{C}$  NMR spectrum of compound **2** ( $\text{CDCl}_3$ , 100 MHz)



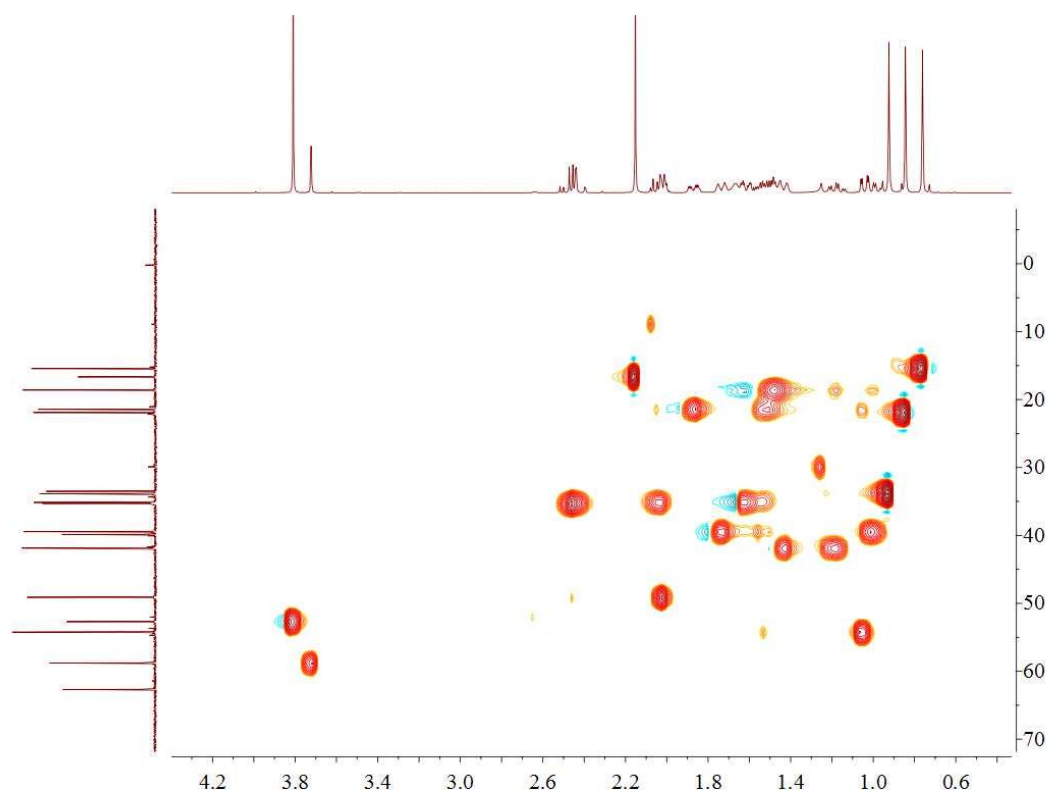

**Figure S18.** The HSQC spectrum of compound 2

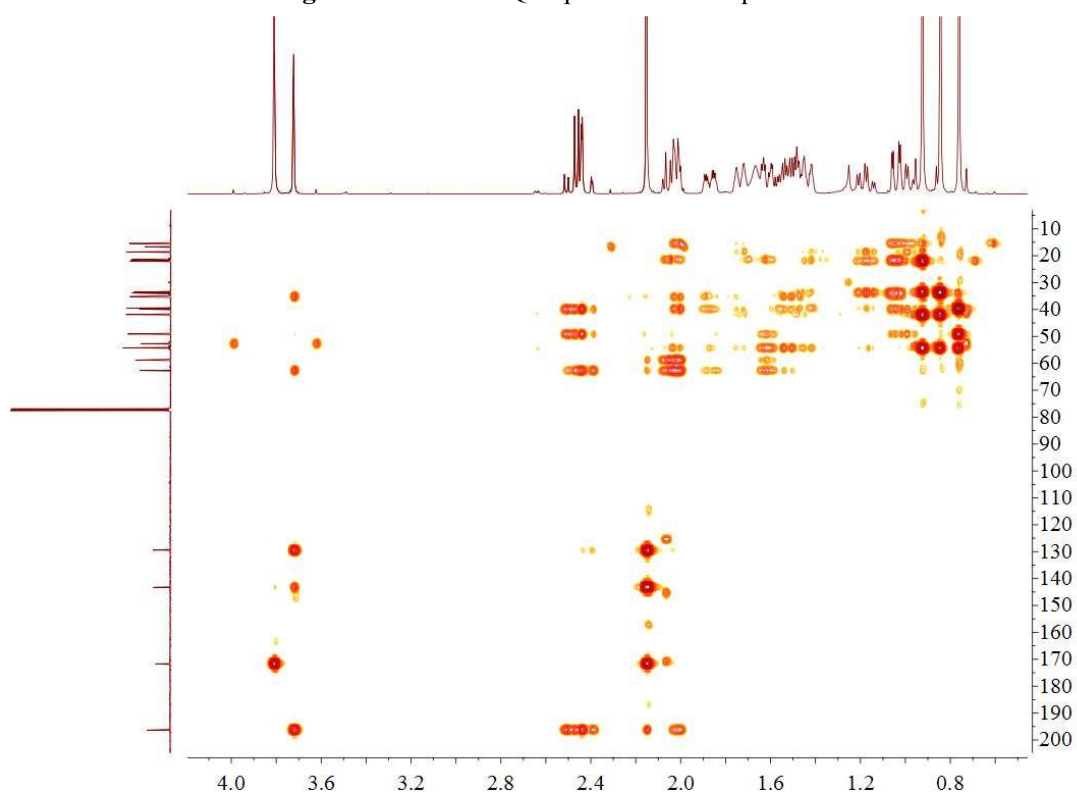

**Figure S19.** The HMBC spectrum of compound 2

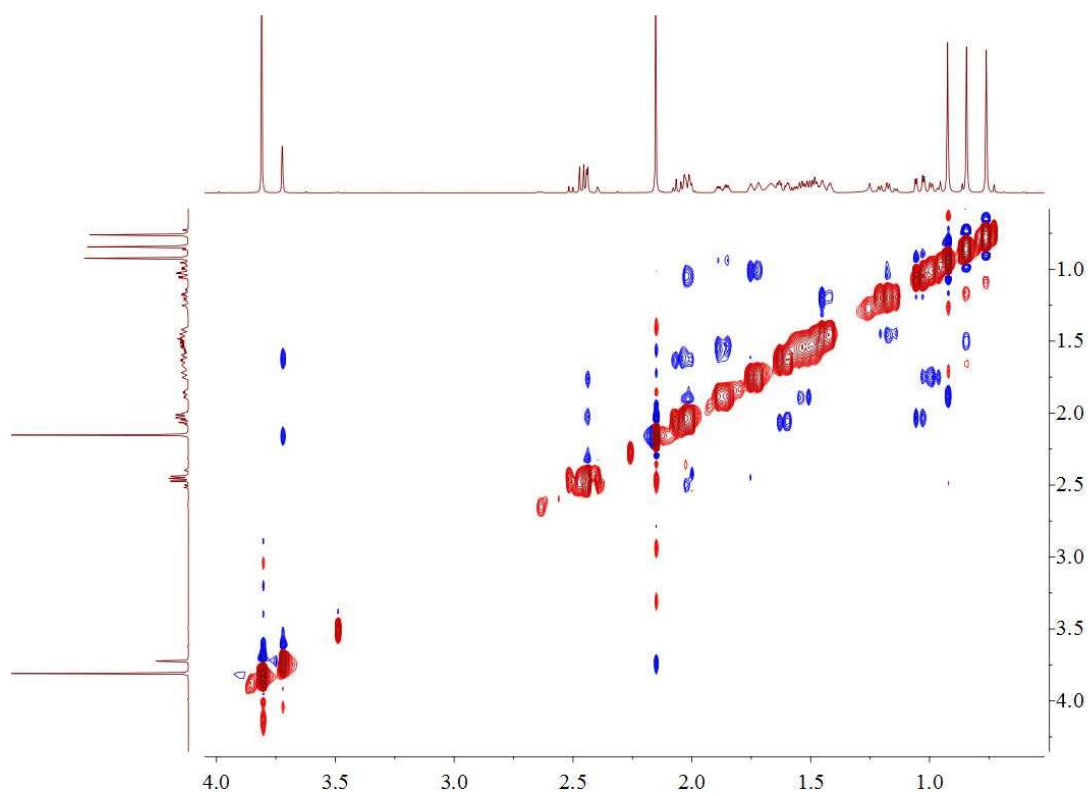

**Figure S20.** The NOESY spectrum of compound **2** (CDCl<sub>3</sub>, 400 MHz)

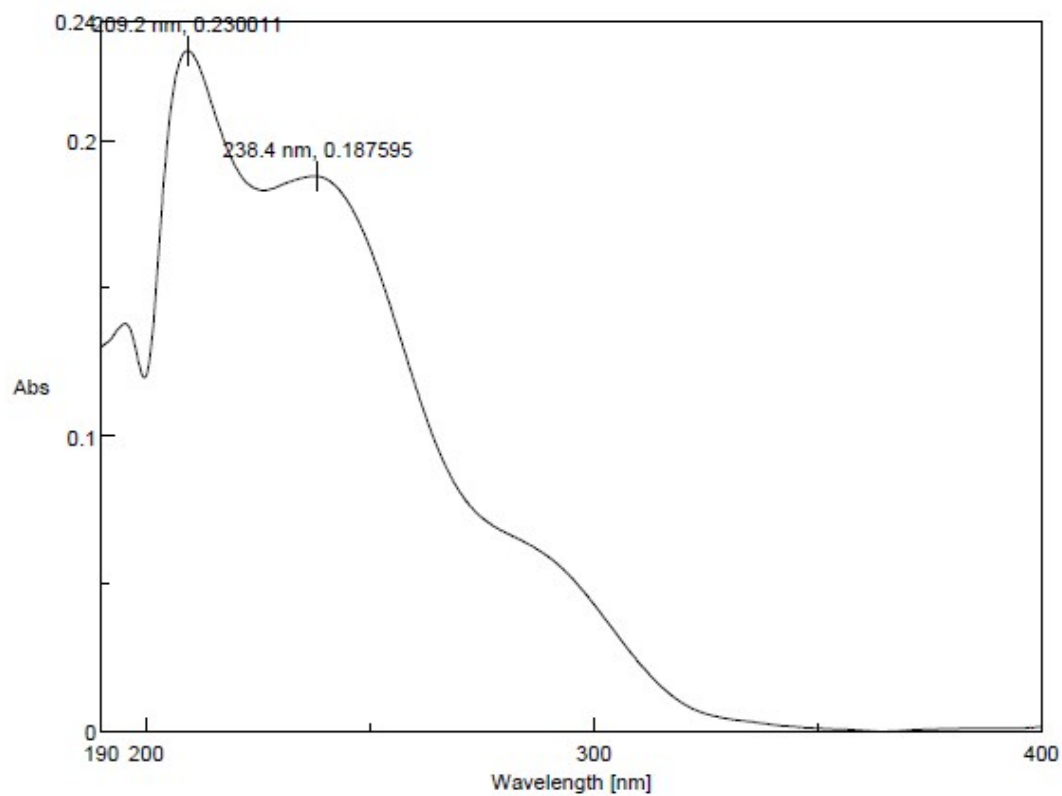

Figure S21. The UV spectrum of compound 3 in MeOH

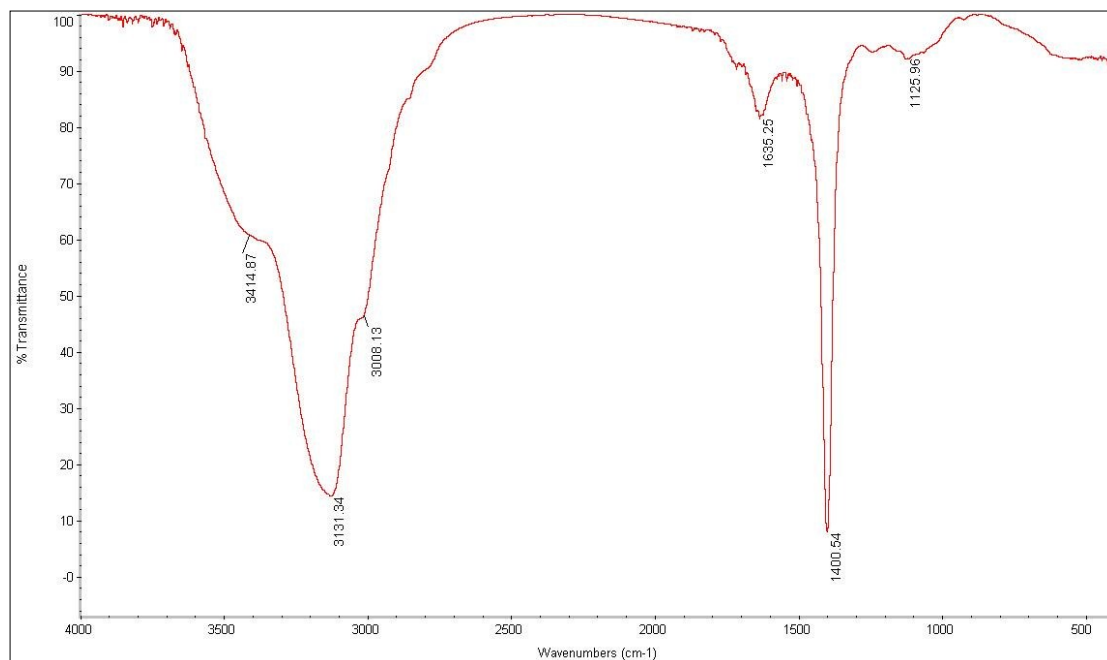

Figure S22. The IR spectrum of compound 3

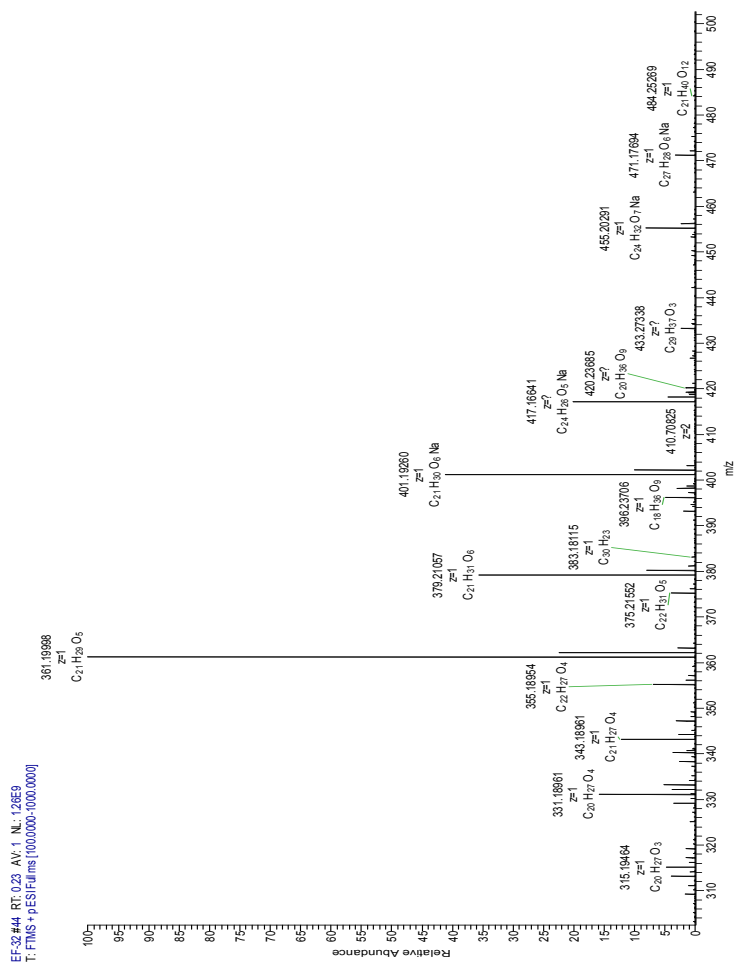

| m/z       | Theo. Mass | Delta (ppm) | RDB equiv. | Composition                                    |
|-----------|------------|-------------|------------|------------------------------------------------|
| 379.21057 | 379.21152  | -2.49       | 6.5        | C <sub>21</sub> H <sub>31</sub> O <sub>6</sub> |
|           | 379.20564  | 13.00       | 15.5       | C <sub>28</sub> H <sub>27</sub> O              |
|           | 379.19626  | 37.74       | 2.5        | C <sub>17</sub> H <sub>31</sub> O <sub>9</sub> |
|           | 379.22677  | -42.72      | 10.5       | C <sub>25</sub> H <sub>31</sub> O <sub>3</sub> |
|           | 379.19039  | 53.23       | 11.5       | C <sub>24</sub> H <sub>27</sub> O <sub>4</sub> |
|           | 379.23264  | -58.21      | 1.5        | C <sub>18</sub> H <sub>35</sub> O <sub>8</sub> |
|           | 379.24203  | -82.96      | 14.5       | C <sub>29</sub> H <sub>31</sub>                |
|           | 379.17513  | 93.46       | 7.5        | C <sub>20</sub> H <sub>27</sub> O <sub>7</sub> |
|           | 379.24790  | -98.44      | 5.5        | C <sub>22</sub> H <sub>35</sub> O <sub>5</sub> |
|           | 379.16926  | 108.95      | 16.5       | C <sub>27</sub> H <sub>23</sub> O <sub>2</sub> |

Figure S23. The HRESIMS spectrum of compound 3

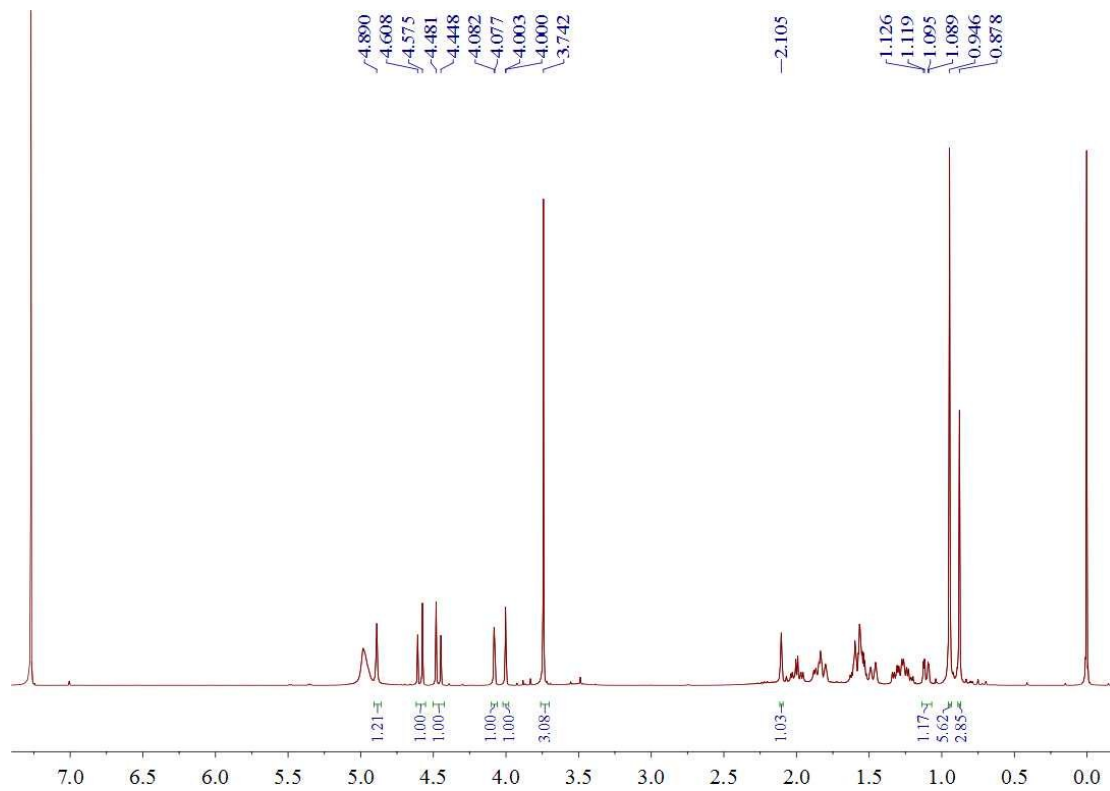

**Figure S24.** The  $^1\text{H}$  NMR spectrum of compound **3** ( $\text{CDCl}_3$ , 400 MHz)

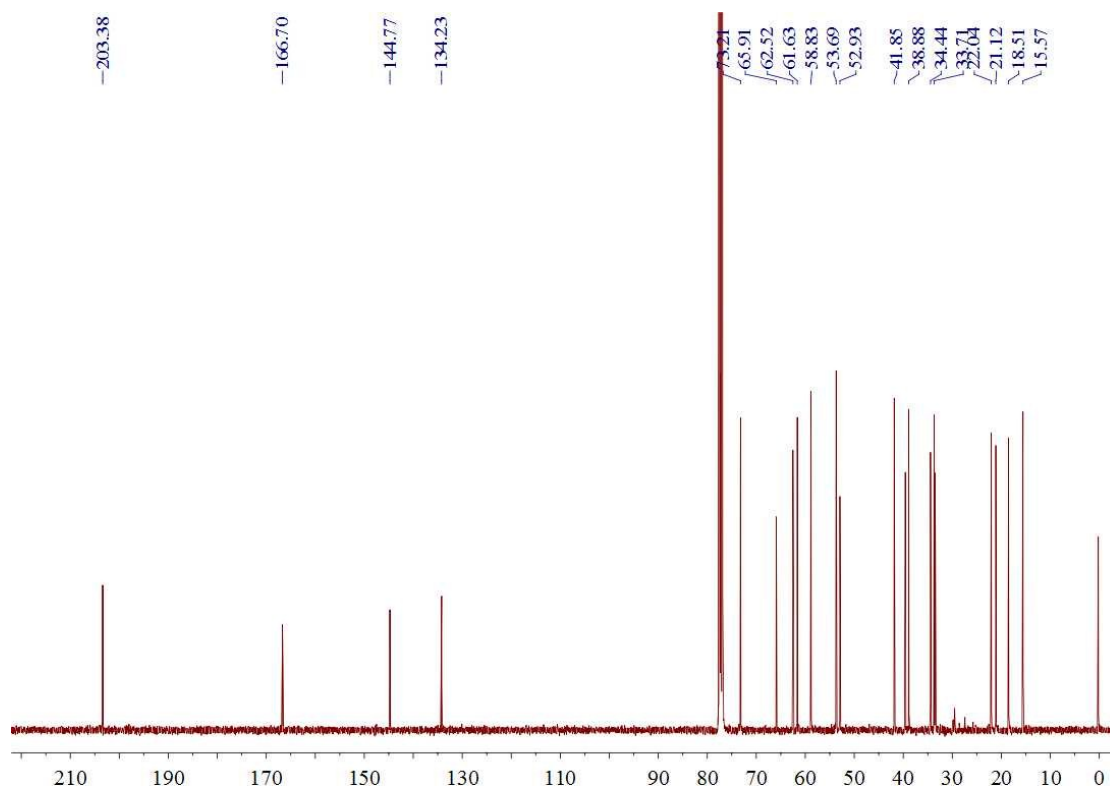

**Figure S25.** The  $^{13}\text{C}$  NMR spectrum of compound **3** ( $\text{CDCl}_3$ , 100 MHz)

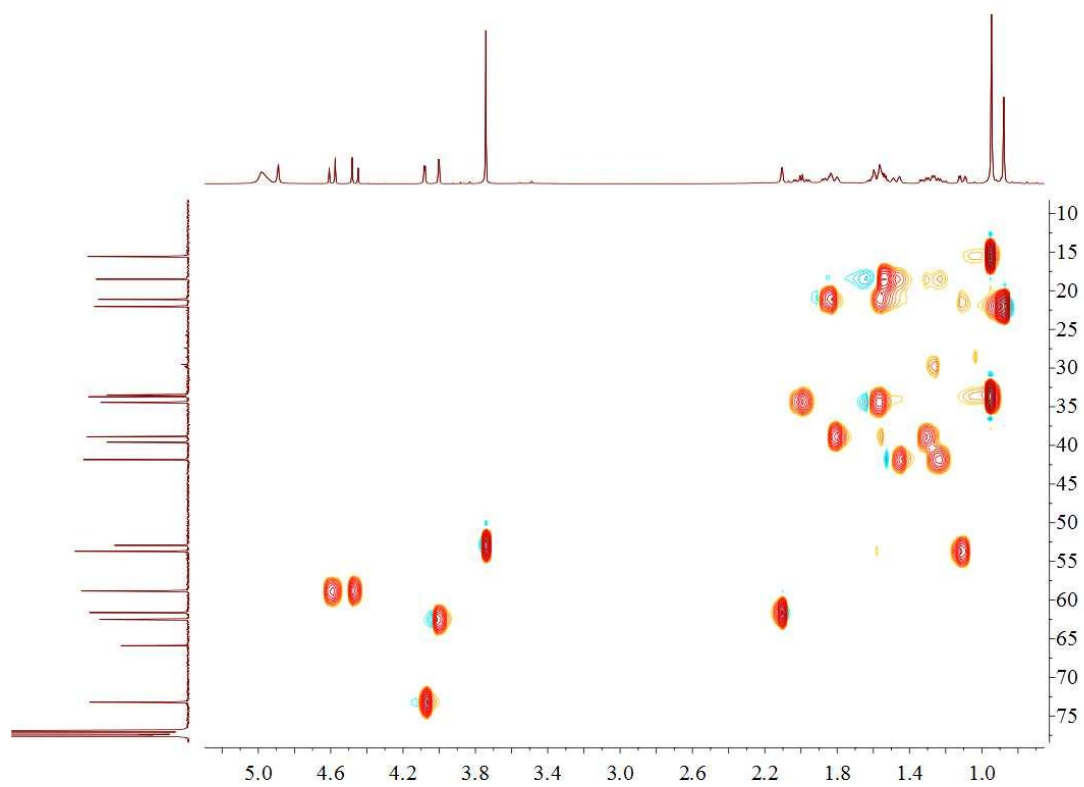

**Figure S26.** The HSQC spectrum of compound **3**

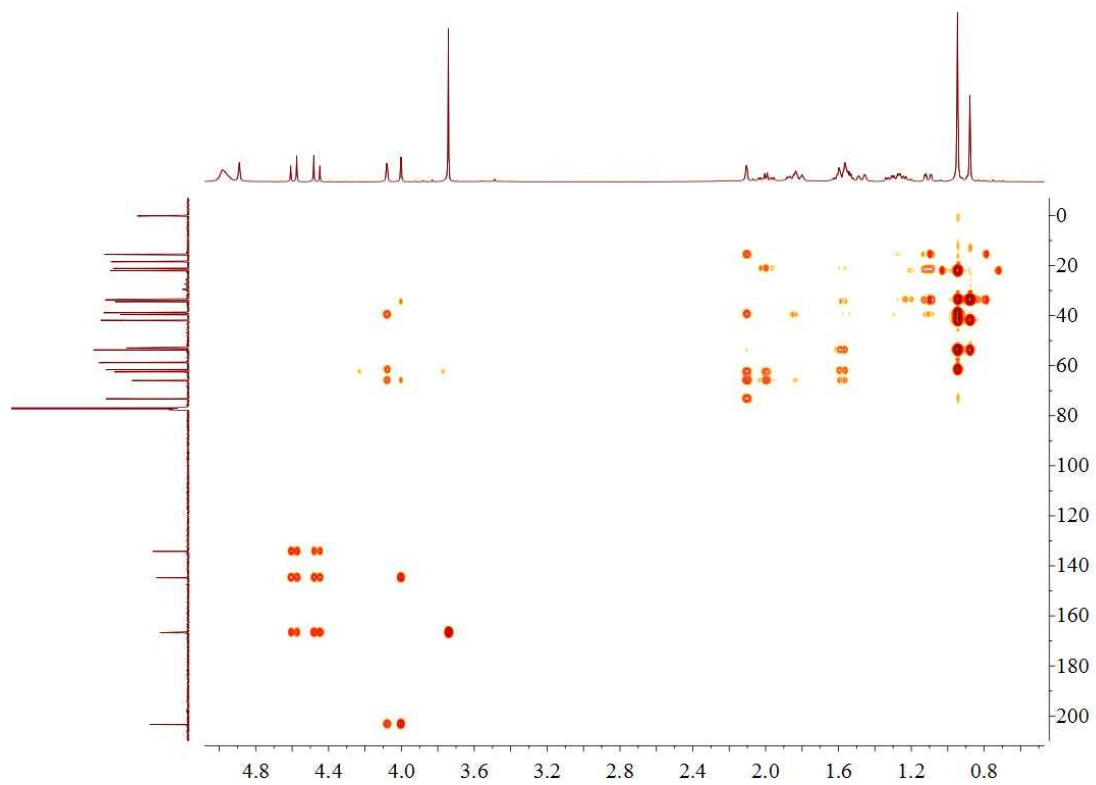

**Figure S27.** The HMBC spectrum of compound **3**

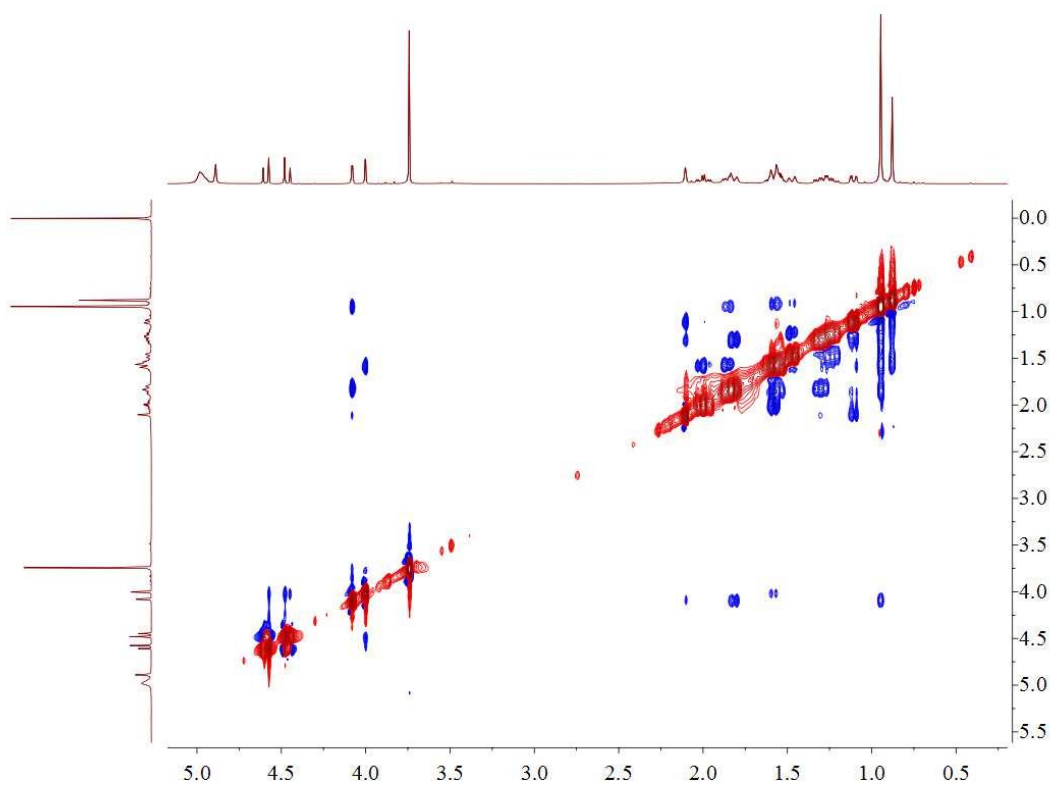

**Figure S28.** The NOESY spectrum of compound **3** ( $\text{CDCl}_3$ , 400 MHz)

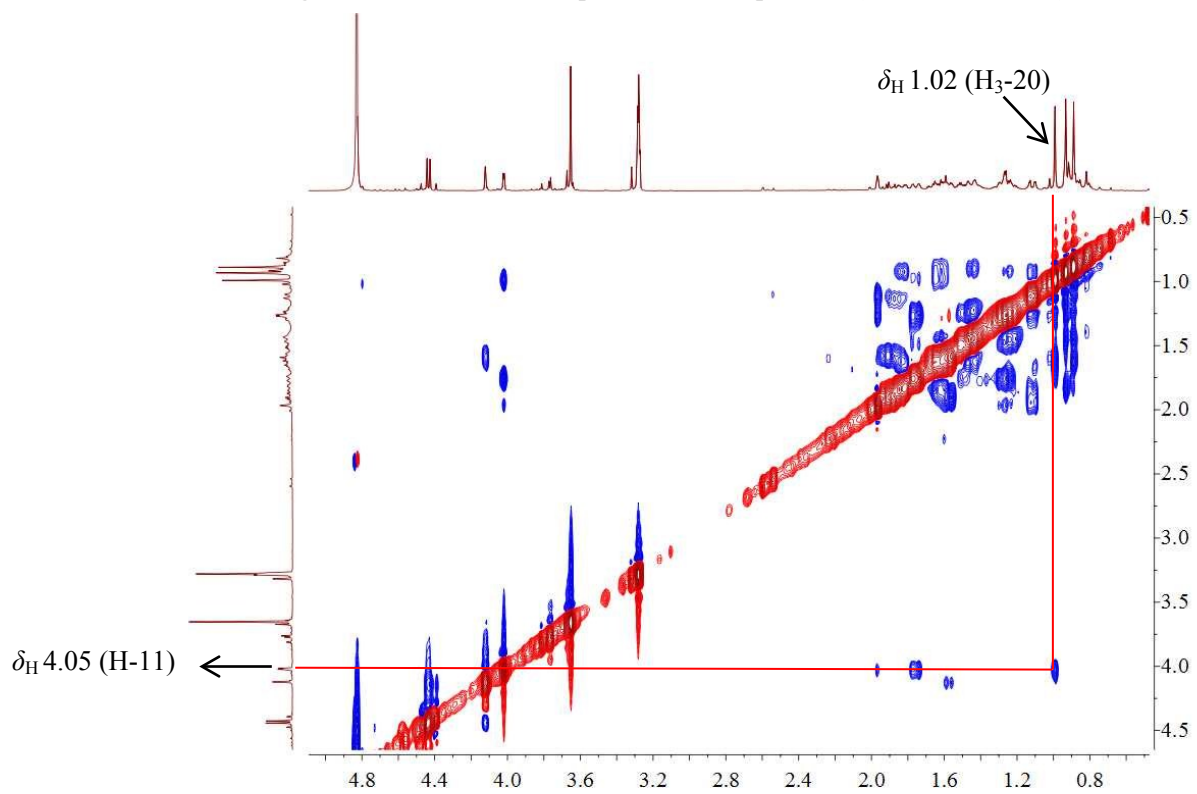

**Figure S29.** The NOESY spectrum of compound **3** ( $\text{CD}_3\text{OD}$ , 400 MHz)

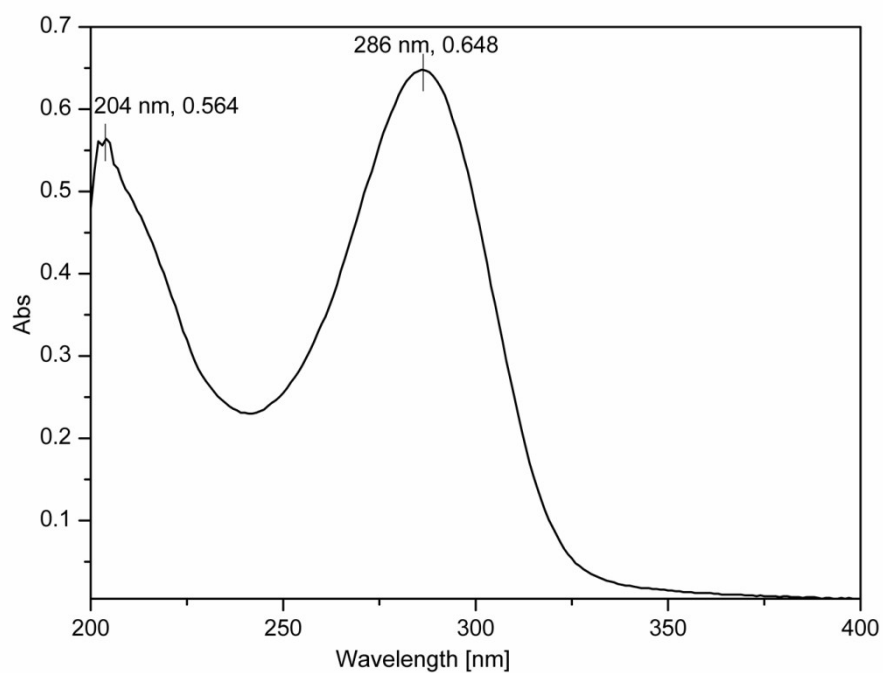

Figure S30. The UV spectrum of compound 4 in MeOH

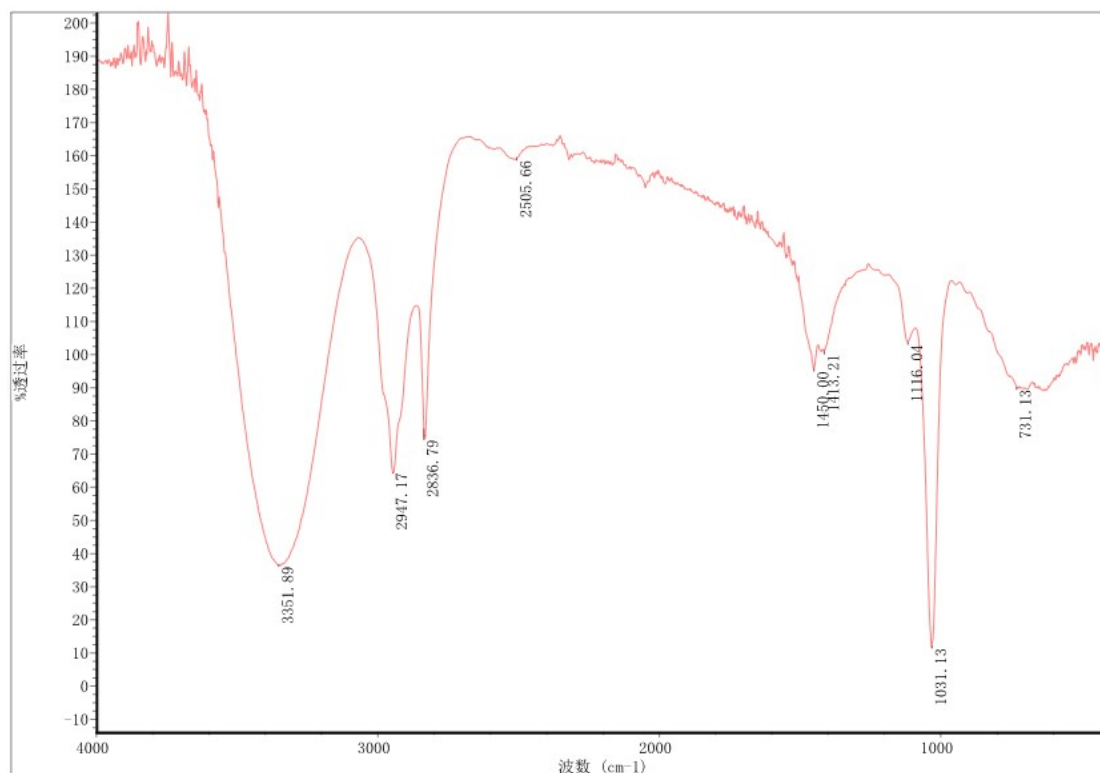

Figure S31. The IR spectrum of compound 4



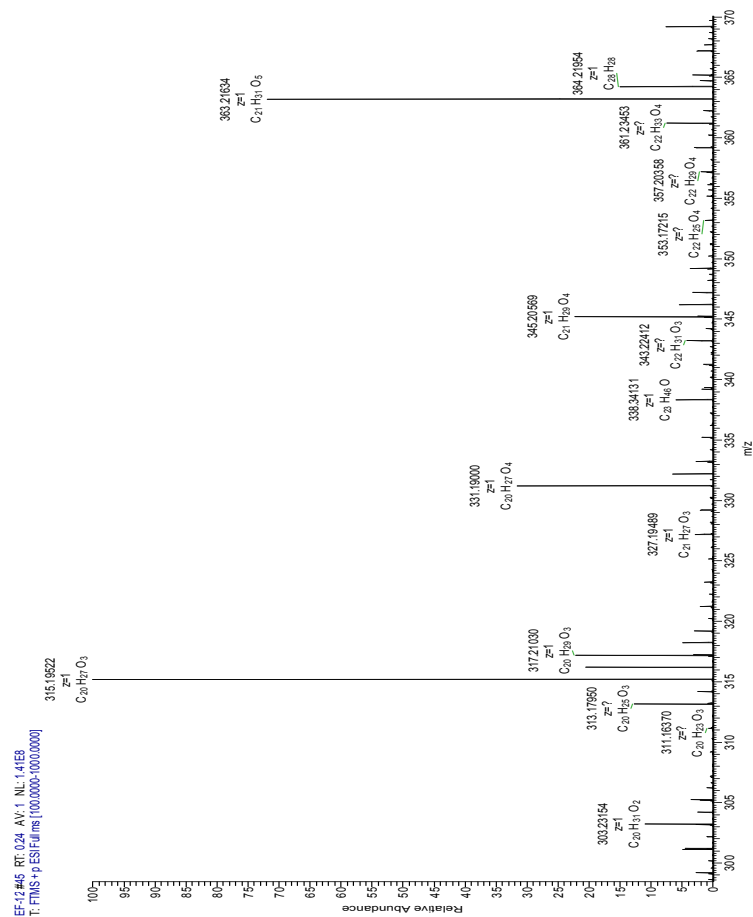

| m/z       | Theo. Mass | Delta (ppm) | RDB equiv. | Composition                                     |
|-----------|------------|-------------|------------|-------------------------------------------------|
| 331.19000 | 331.19039  | -1.16       | 7.5        | C <sub>20</sub> H <sub>27</sub> O <sub>4</sub>  |
|           | 331.17513  | 44.90       | 3.5        | C <sub>16</sub> H <sub>27</sub> O <sub>7</sub>  |
|           | 331.20564  | -47.23      | 11.5       | C <sub>24</sub> H <sub>27</sub> O               |
|           | 331.16926  | 62.63       | 12.5       | C <sub>23</sub> H <sub>23</sub> O <sub>2</sub>  |
|           | 331.21152  | -64.96      | 2.5        | C <sub>17</sub> H <sub>31</sub> O <sub>6</sub>  |
|           | 331.15987  | 90.96       | -0.5       | C <sub>12</sub> H <sub>27</sub> O <sub>10</sub> |
|           | 331.15400  | 108.70      | 8.5        | C <sub>19</sub> H <sub>23</sub> O <sub>5</sub>  |
|           | 331.22677  | -111.03     | 6.5        | C <sub>21</sub> H <sub>31</sub> O <sub>3</sub>  |
|           | 331.14813  | 126.43      | 17.5       | C <sub>26</sub> H <sub>19</sub>                 |
|           | 331.13874  | 154.76      | 4.5        | C <sub>15</sub> H <sub>23</sub> O <sub>8</sub>  |

**Figure S32.** The HRESIMS spectrum of compound **4**

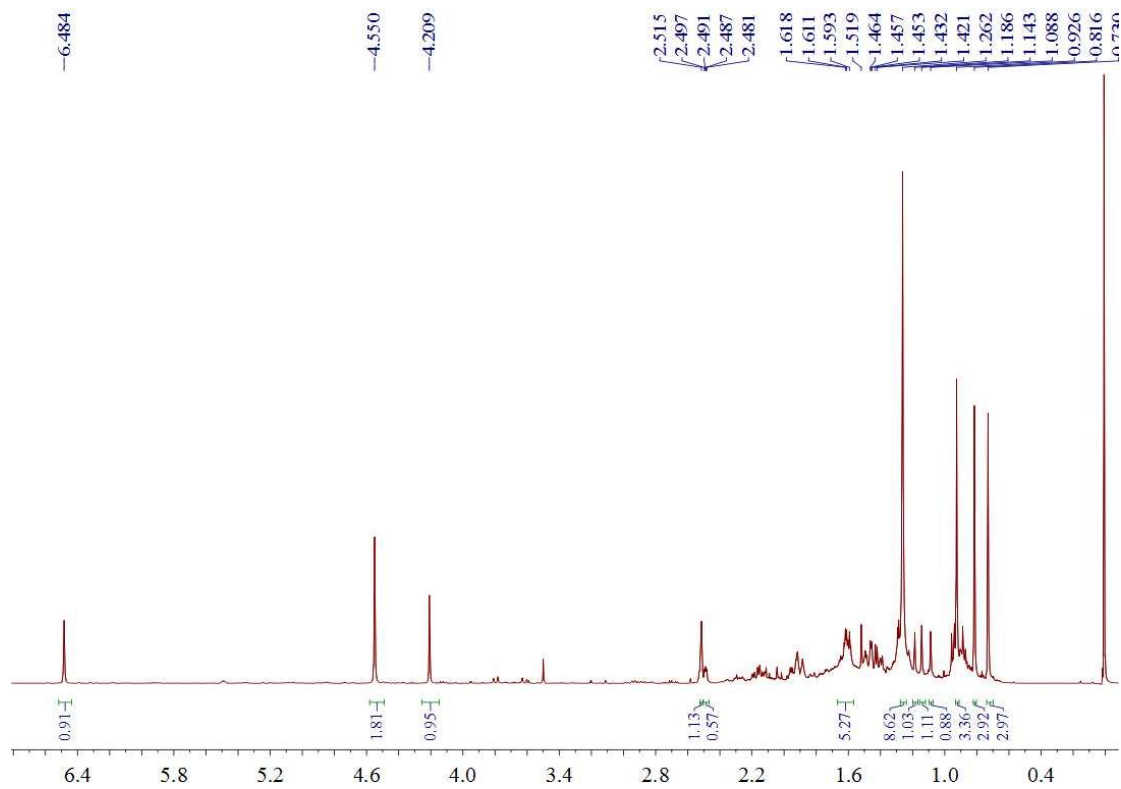

**Figure S33.** The  $^1\text{H}$  NMR spectrum of compound **4** ( $\text{CDCl}_3$ , 400 MHz)

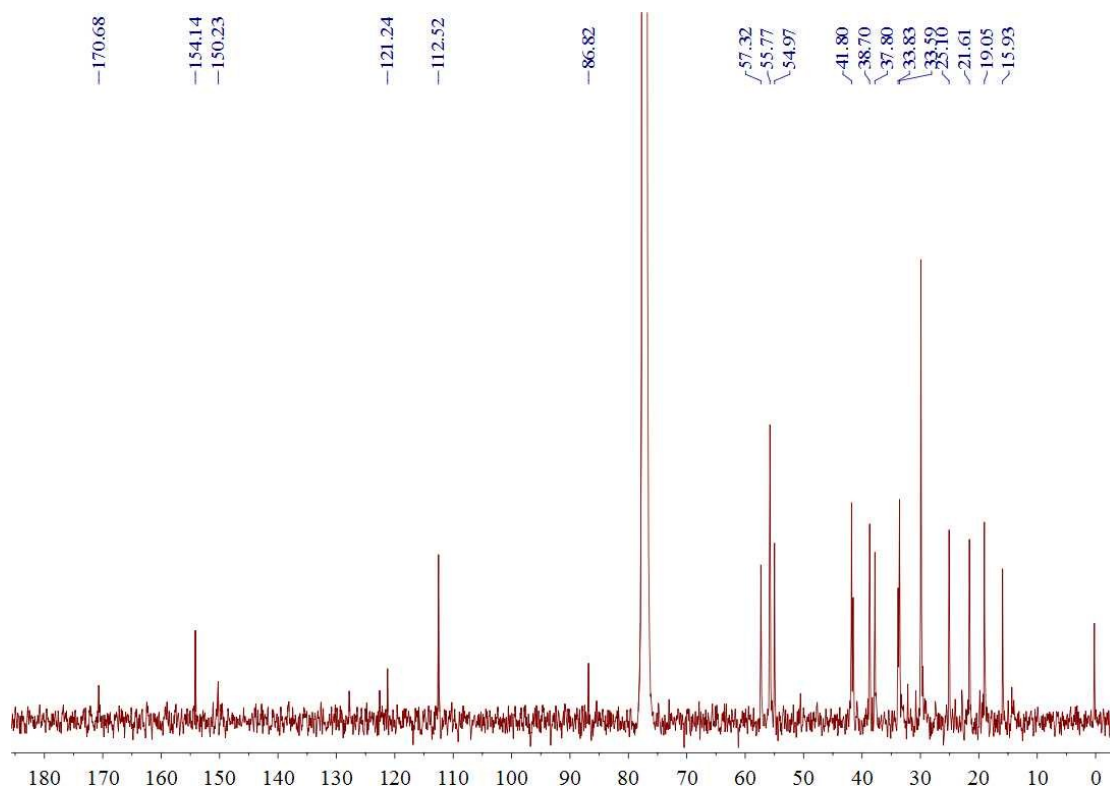

**Figure S34.** The  $^{13}\text{C}$  NMR spectrum of compound **4** ( $\text{CDCl}_3$ , 100 MHz)

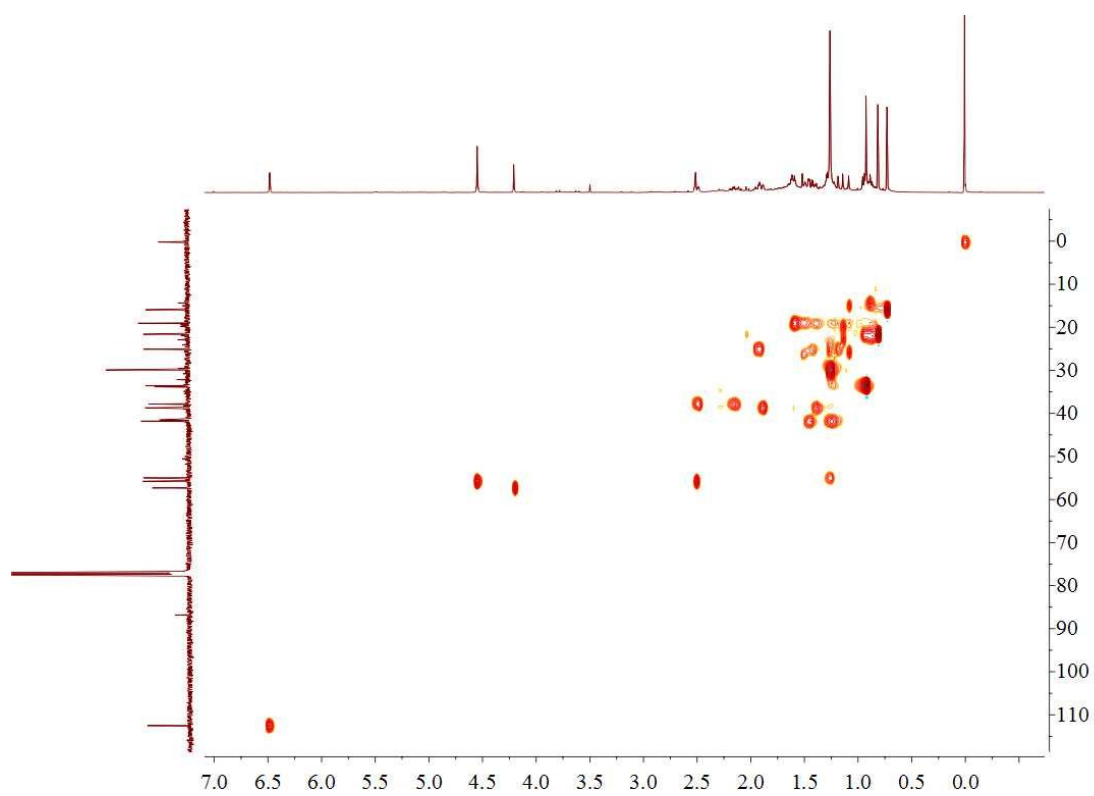

**Figure S35.** The HSQC spectrum of compound **4**

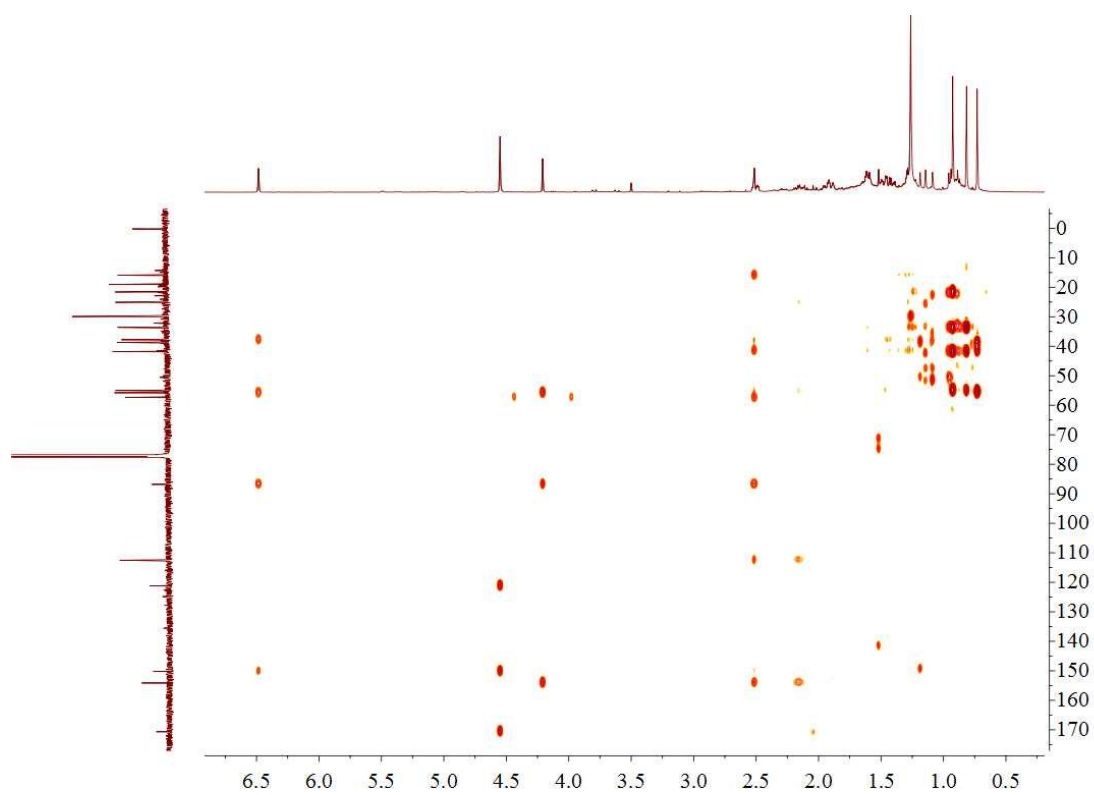

**Figure S36.** The HMBC spectrum of compound **4** (CDCl<sub>3</sub>, 400 MHz)

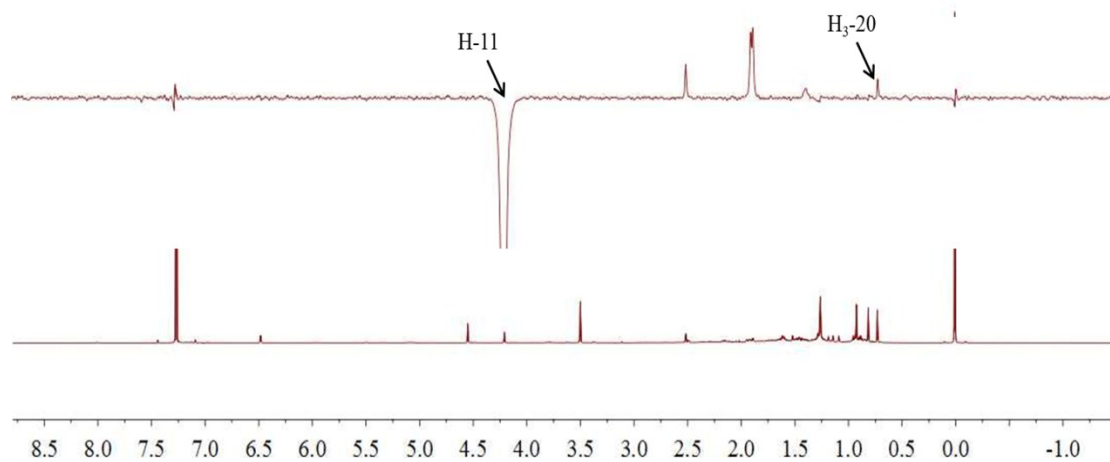

**Figure S37.** The NOE spectrum of compound **4** (CDCl<sub>3</sub>, 600 MHz)

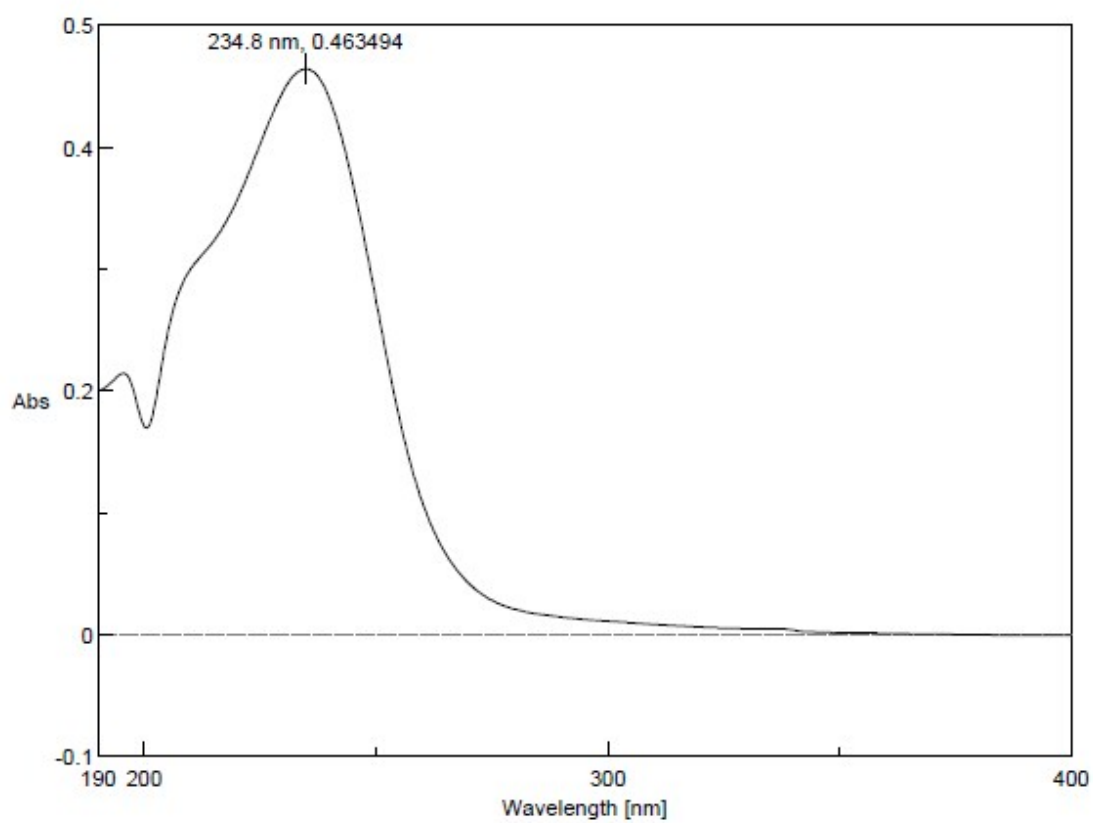

**Figure S38.** The UV spectrum of compound **5** in MeOH

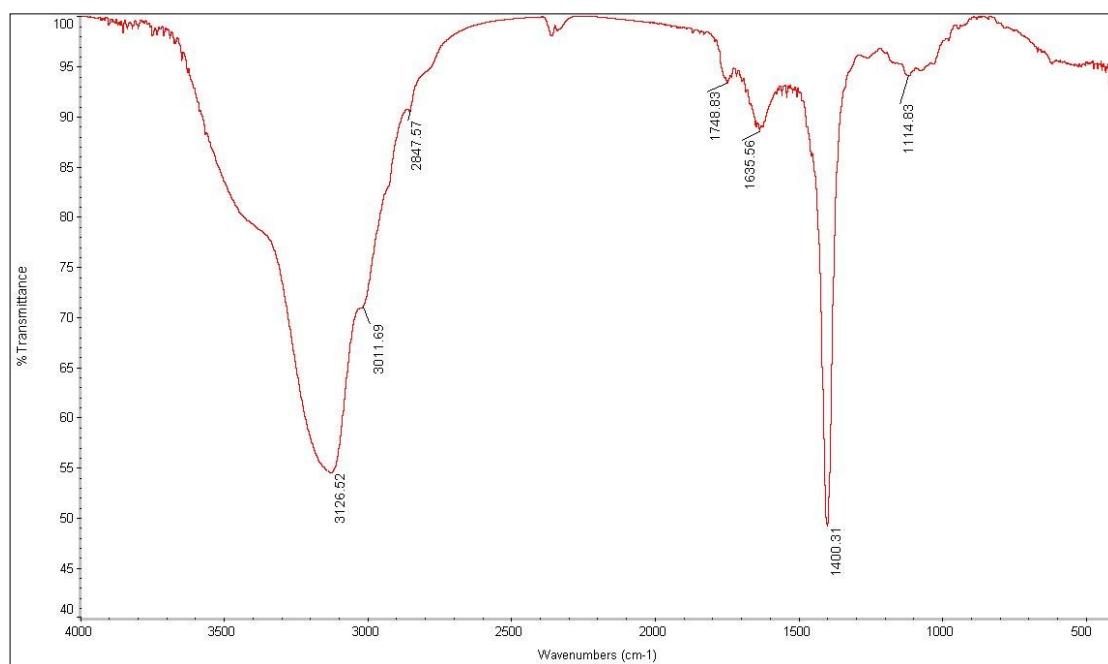

**Figure S39.** The IR spectrum of compound **5**



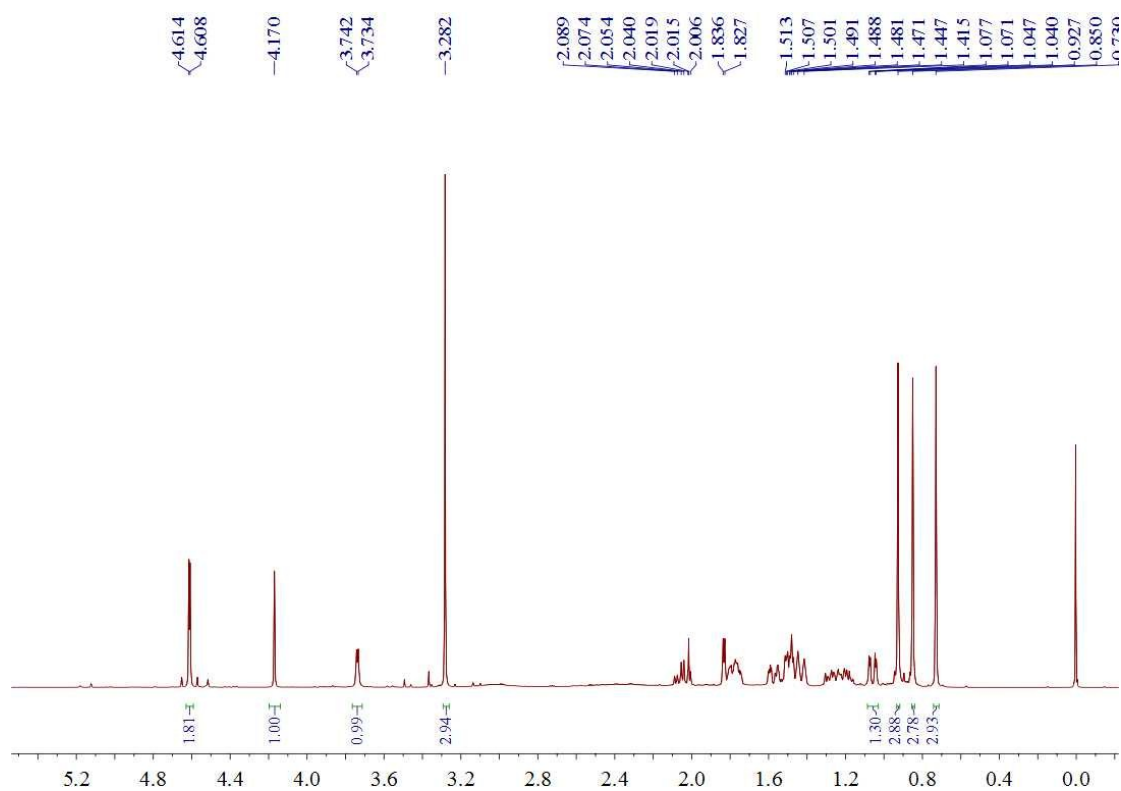

**Figure S41.** The  $^1\text{H}$  NMR spectrum of compound **5** ( $\text{CDCl}_3$ , 400 MHz)

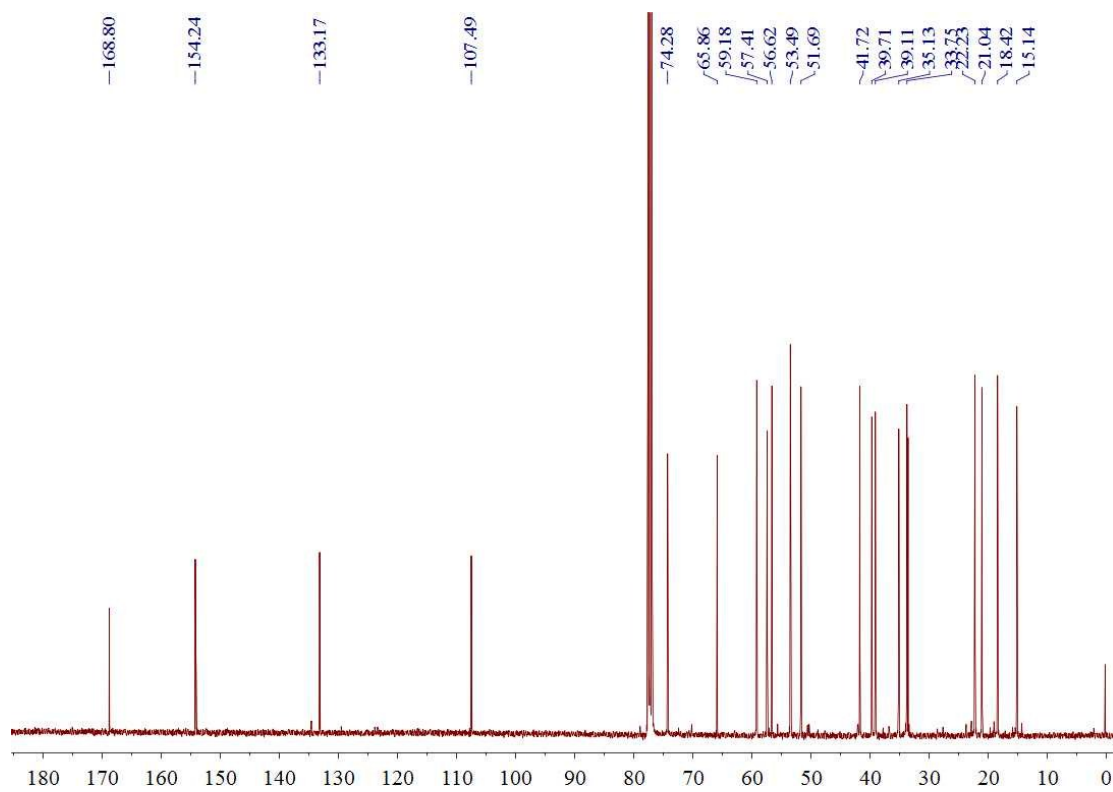

**Figure S42.** The  $^{13}\text{C}$  NMR spectrum of compound **5** ( $\text{CDCl}_3$ , 100 MHz)

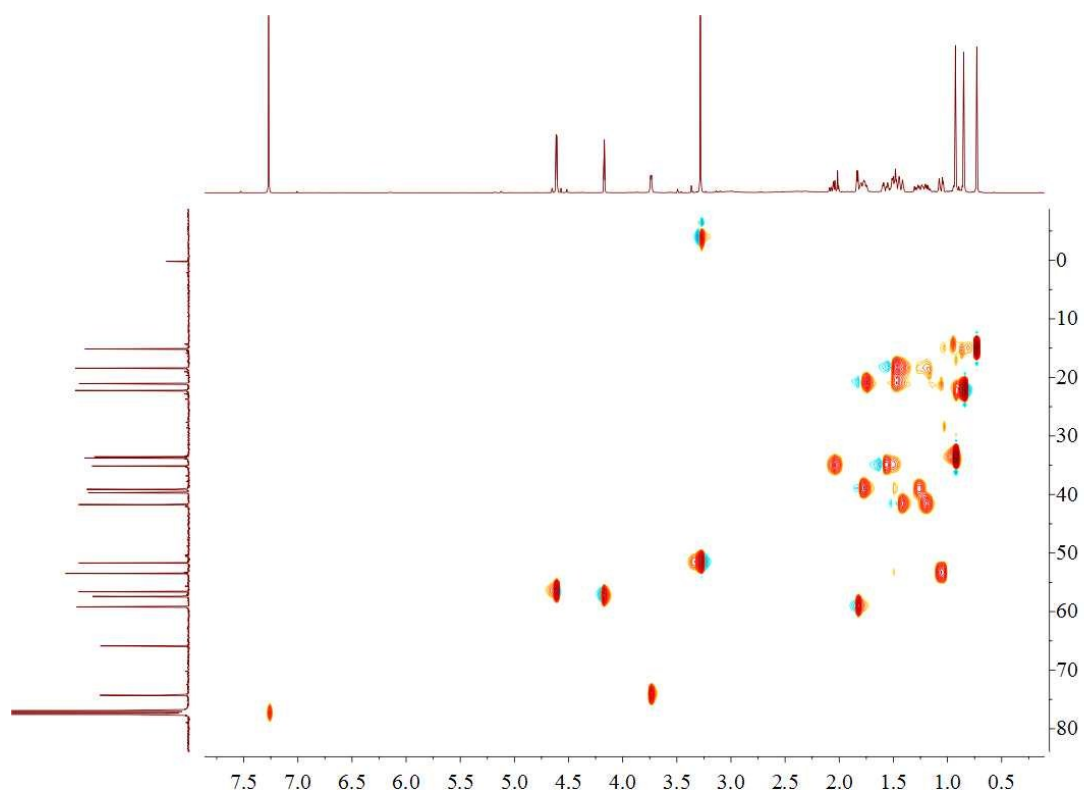

**Figure S43.** The HSQC spectrum of compound **5**

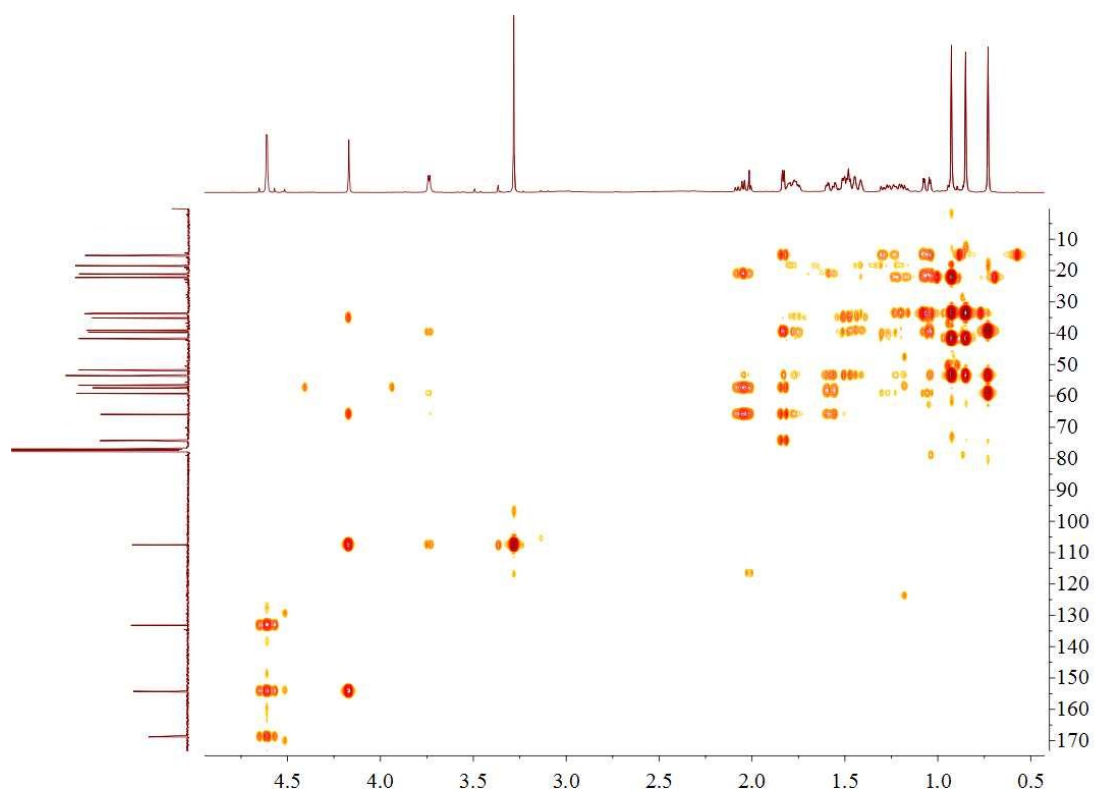

**Figure S44.** The HMBC spectrum of compound **5**



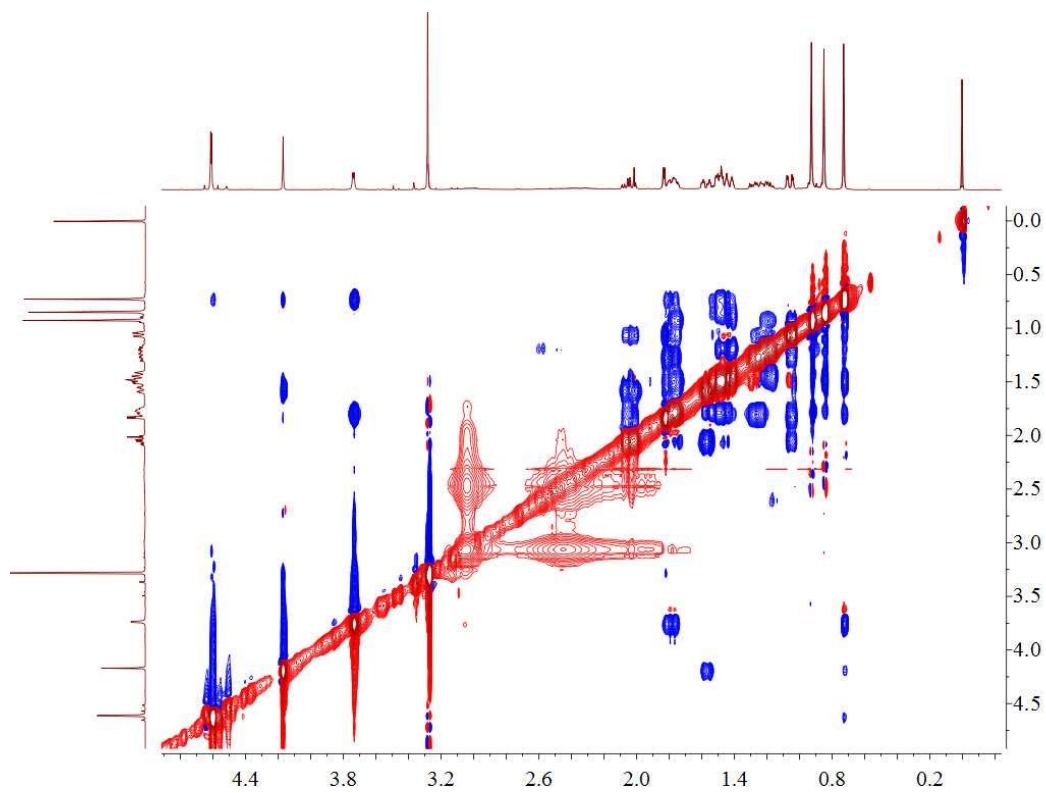

**Figure S45.** The NOESY spectrum of compound **5** ( $\text{CDCl}_3$ , 400 MHz)

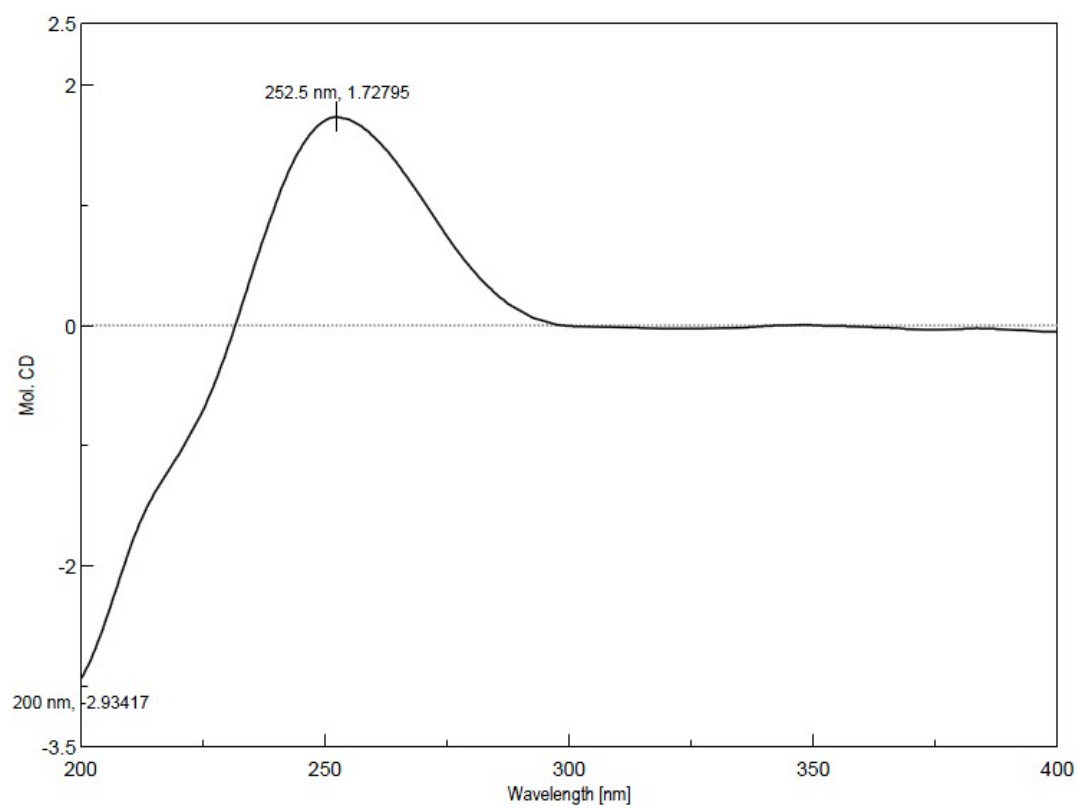

**Figure S46.** The ECD spectrum of compound **5** in MeOH
